# Supplementary material for: Dual-responsive BN-embedded phenacenes featuring mechanochromic luminescence and ratiometric sensing of fluoride ions
Source: Royal Society of Chemistry journal article supplement (doi:10.1039/c8tc02449a), 2018-01-01
Supplement: c8tc02449a1.pdf [file c8tc02449a1.pdf]

## Supporting Information

# **Dual-Responsive BN-Embedded Phenacenes Featuring Mechanochromic Luminescence and Ratiometric Sensing of Fluoride Ion**

Yi Han, Wei Yuan, Hongyan Wang, Mengwei Li, Wenqin Zhang and Yulan Chen\*

Tianjin Key Laboratory of Molecular Optoelectronic Science, Department of Chemistry,

Tianjin University, Tianjin, 300354, P. R. China

E-mail: [yulan.chen@tju.edu.cn](mailto:yulan.chen@tju.edu.cn).

## Experimental Section

**Materials:** Unless noted otherwise, all chemicals were purchased from Aldrich or Acros and used without further purification. 3,6-Di(thiophen-2-yl)benzene-1,2-diamine,<sup>1</sup> 4,9-dibromo-[1,2,5]thiadiazolo[3,4-g]quinoxaline (1),<sup>2</sup> 2-(tri-*n*-butylstannyl)thiophene<sup>3</sup> and 2-(tri-*n*-butylstannyl)benzothiophene<sup>4</sup> were prepared according to literatures. Dichloromethane (CH<sub>2</sub>Cl<sub>2</sub>) was distilled over CaH<sub>2</sub>. Tetrahydrofuran (THF) was distilled over sodium and benzophenone. All reactions were performed under an atmosphere of nitrogen and monitored by TLC with silica gel 60 F254 (Merck, 0.2 mm). Column chromatography was carried out on silica gel (200-300 mesh).

**Characterization:** <sup>1</sup>H and <sup>13</sup>C NMR spectra were recorded on a Bruker AV400 spectrometer in CDCl<sub>3</sub>. High resolution mass spectra (ESI-TOF) were recorded from Perkin-Elmer TURBOMASS instrument. UV-vis absorption spectra were obtained on a PerkinElmer Lambda 750 UV/VIS/NIR spectrometer. Photoluminescent (PL) spectra were recorded on a Hitachi F-7000 spectrometer. Thermogravimetric analyses (TGA) were carried out using a TA Instruments Q-50 with a heating rate of 10 °C/min. Differential scanning calorimetry (DSC) measurements were conducted using the TA Instruments Q-20 with a scan rate of 10 °C/min. The powder XRD patterns were obtained with a Rigaku SmartLab (9 kW) X-ray diffractometer. The single crystal X-ray diffraction was recorded on a Rigaku SCX-mini diffractometer with graphite monochromatic Mo-K $\alpha$  radiation ( $\lambda = 0.7173 \text{ \AA}$ ) by  $\omega$  scan mode. The absolute fluorescence quantum yields were measured by using an absolute PL quantum yield spectrometer (Edinburg FLS-920 fluorescence spectrometer) with a calibrated integrating sphere and fluorescence lifetime measurements were recorded on the same spectrometer using time-correlated single photon counting (TCSPC). Cyclic voltammetric experiments were carried out using a CHI 660E electrochemical workstation (CHI Instruments, ChenHua, Shanghai, China). All voltammograms were acquired at room temperature. A standard three electrode electrochemical cell arrangement was employed using a glassy

carbon (GC) as working electrode, a Pt wire as counter electrode, and a standard calomel electrode (SCE) as reference electrode in 0.1 M tetrabutylammonium hexafluorophosphate ( $n\text{-Bu}_4\text{NPF}_6$ ) as the supporting electrolyte at the scan rate of 100 mV/s. The potentials are reported vs the  $\text{Fc}^+/\text{Fc}$  redox couple as a standard. Density functional theory (DFT) calculations were performed in Gaussian 09 software at the B3LYP functional with the 6-31G\* basis set level. The  $^{13}\text{C}$  cross-polarization magic angle spinning (CP/MAS) spectra were recorded with a 4 mm double-resonance MAS probe and at a MAS rate of 10.0 kHz with a contact time of 2 ms (ramp 100) and a pulse delay of 3 s.

### Synthesis:

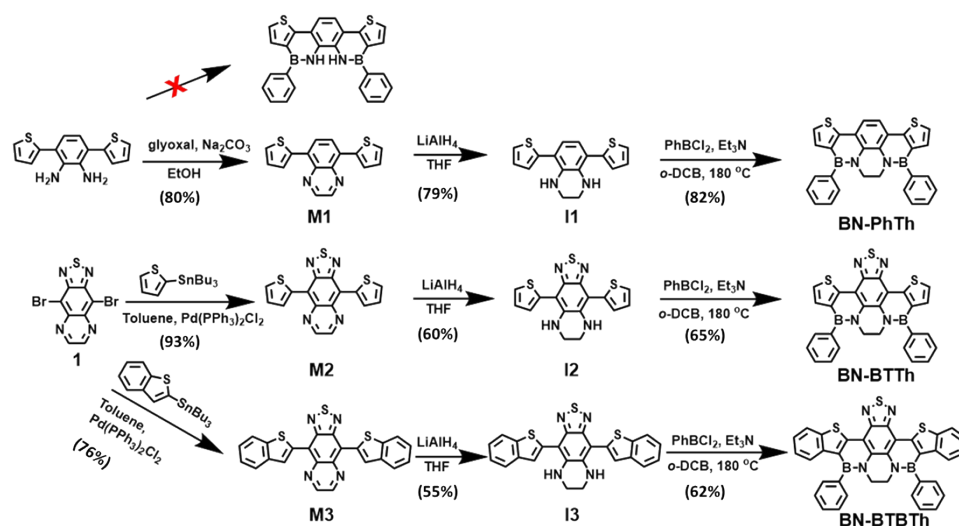

**5,8-Di(thiophen-2-yl)quinoxaline (M1).** To a solution of 3,6-di(thiophen-2-yl)benzene-1,2-diamine (1.00 g, 3.67 mmol) in ethanol (50 mL) under argon was added glyoxal (40% in water) (1.16 mL, 7.92 mmol) and  $\text{Na}_2\text{CO}_3$  (3.89 g, 36.70 mmol). The reaction mixture was refluxed for 2 h and the solution turned yellow. Then, water was added (50 mL) and the product was extracted by 3 x 50 mL of dichloromethane. The organic phase was dried over  $\text{MgSO}_4$  and the solvent was evaporated. The product was purified by chromatography on silica gel to give product **M1** as a yellow powder (1.06 g, 80%). m.p., 137.2–138.5 °C.  $^1\text{H}$  NMR (400 MHz,  $\text{CDCl}_3$ ):  $\delta$  8.94 (s, 2H), 8.08 (s, 2H), 7.79 (dd,  $J = 3.7, 1.0$  Hz, 2H), 7.50 (dd,  $J = 5.1, 1.0$  Hz, 2H), 7.18 (dd,  $J = 5.1, 3.7$  Hz, 2H).  $^{13}\text{C}$  NMR (100 MHz,  $\text{CDCl}_3$ ):  $\delta$  143.6,

139.9, 138.5, 132.1, 128.5, 127.9, 127.2, 126.9. HRMS (ESI-TOF) m/z: [M + H]<sup>+</sup> Calcd for C<sub>16</sub>H<sub>11</sub>N<sub>2</sub>S<sub>2</sub> 295.0364; Found 295.0364.

**General Procedure for the Synthesis of M2 and M3.** A mixture of the precursor **1**, tributyltin derivatives of thiophene or benzothiophene and THF/toluene (v/v, 1:1) was carefully degassed before and after Pd(PPh<sub>3</sub>)<sub>2</sub>Cl<sub>2</sub> was added. The mixture was heated to reflux and stirred under nitrogen overnight. CH<sub>2</sub>Cl<sub>2</sub> and brine was added, and the organic layer was separated and dried over anhydrous Na<sub>2</sub>SO<sub>4</sub>. After the removal of the solvent, the residue was purified by chromatography on a silica gel column to afford the desired product (**M2**, **M3**). Owing to their poor solubilities, the <sup>1</sup>H and <sup>13</sup>C NMR of **M2** and **M3** cannot be measured in CDCl<sub>3</sub> solution.

**4,9-Di(thiophen-2-yl)-[1,2,5]thiadiazolo[3,4-g]quinoxaline (M2).** Compound **1** (1.00 g, 2.89 mmol), tributyl(thiophen-2-yl)stannane (2.70 g, 7.23 mmol), Pd(PPh<sub>3</sub>)<sub>2</sub>Cl<sub>2</sub> (20.28 mg, 0.29 mmol), THF (50 mL) and toluene (50 mL) were used, and CH<sub>2</sub>Cl<sub>2</sub>/THF (v/v, 10:1) was used as the eluent to afford **M2** as a blue solid (950 mg, 93%). m.p., 143.5–144.7 °C. HRMS (ESI-TOF) m/z: [M + H]<sup>+</sup> Calcd for C<sub>16</sub>H<sub>9</sub>N<sub>4</sub>S<sub>3</sub> 352.9989; Found 352.9989.

**4,9-Bis(benzo[*b*]thiophen-2-yl)-[1,2,5]thiadiazolo[3,4-g]quinoxaline (M3).** Compound **1** (1.00 g, 2.89 mmol), benzo[*b*]thiophen-2-yltributylstannane (3.06 g, 7.23 mmol), Pd(PPh<sub>3</sub>)<sub>2</sub>Cl<sub>2</sub> (20.28 mg, 0.29 mmol), THF (50 mL) and toluene (50 mL) were used, and CH<sub>2</sub>Cl<sub>2</sub>/THF (v/v, 10:1) was used as the eluent to afford **M2** as a blue solid (1.00 g, 76%). m.p., 151.8–153.2 °C. HRMS (ESI-TOF) m/z: [M + H]<sup>+</sup> Calcd for C<sub>24</sub>H<sub>13</sub>N<sub>4</sub>S<sub>3</sub> 453.0302; Found 453.0302.

**General Procedure for the Synthesis of I1, I2 and I3.** To a solution of precursor **M1-M3** in THF under argon was added LiAlH<sub>4</sub>. The reaction mixture was stirred for 1 h at the room temperature. Then water was added and the product was extracted by ethyl acetate. The

organic phase was dried over  $\text{MgSO}_4$  and the solvent was evaporated. Quick filtration through a silica gel plug gave intermediate **I1-I3**.

**5,8-Di(thiophen-2-yl)-1,2,3,4-tetrahydroquinoxaline (I1).** **M1** (0.50 g, 1.70 mmol), THF (15 mL),  $\text{LiAlH}_4$  (1.29 g, 34.0 mmol) were used. The reaction mixture was stirred for 1 h and then the solution turned colorless.  $\text{CH}_2\text{Cl}_2/n$ -hexane (v/v, 1:1) was used as the eluent to afford **I1** as a white solid (0.40 g, 79%). m.p., 129.5–131.2 °C.  $^1\text{H}$  NMR (400 MHz,  $\text{CDCl}_3$ ):  $\delta$  7.35 (d,  $J = 5.1$  Hz, 2H), 7.20 (d,  $J = 3.5$  Hz, 2H), 7.12 (dd,  $J = 5.1, 3.5$  Hz, 2H), 6.72 (s, 2H), 4.47 (s, 2H), 3.43 (s, 4H).  $^{13}\text{C}$  NMR (100 MHz,  $\text{CDCl}_3$ ):  $\delta$  141.2, 131.4, 127.7, 126.1, 125.5, 120.1, 119.0, 41.0. HRMS (ESI-TOF) m/z:  $[\text{M} + \text{H}]^+$  Calcd for  $\text{C}_{16}\text{H}_{15}\text{N}_2\text{S}_2$  299.0677; Found 299.0677.

**4,9-Di(thiophen-2-yl)-5,6,7,8-tetrahydro-[1,2,5]thiadiazolo[3,4-g]quinoxaline (I2).** **M2** (0.50 g, 1.40 mmol), THF (15 mL),  $\text{LiAlH}_4$  (1.06 g, 28.0 mmol) were used. The reaction mixture was stirred for 1 h and then the solution turned orange.  $\text{CH}_2\text{Cl}_2$  was used as the eluent to afford **I2** as a yellow solid (0.30 g, 60%). m.p., 142.2–143.9 °C.  $^1\text{H}$  NMR (400 MHz,  $\text{CDCl}_3$ ):  $\delta$  7.52 (dd,  $J = 5.1, 0.7$  Hz, 2H), 7.32–7.28 (dd,  $J = 3.5, 0.7$  Hz, 2H), 7.22 (dd,  $J = 5.1, 3.5$  Hz, 2H), 5.24 (s, 2H), 3.45 (s, 4H).  $^{13}\text{C}$  NMR (100 MHz,  $\text{CDCl}_3$ ):  $\delta$  150.7, 137.8, 135.3, 128.5, 127.6, 127.1, 103.1, 40.2. HRMS (ESI-TOF) m/z:  $[\text{M} + \text{H}]^+$  Calcd for  $\text{C}_{16}\text{H}_{13}\text{N}_4\text{S}_3$  357.0302; Found 357.0302.

**4,9-Bis(benzo[b]thiophen-2-yl)-5,6,7,8-tetrahydro-[1,2,5]thiadiazolo[3,4-g]quinoxaline (I3).** **M3** (0.50 g, 1.10 mmol), THF (15 mL),  $\text{LiAlH}_4$  (0.85 g, 22.0 mmol) were used. The reaction mixture was stirred for 1 h and then the solution turned orange.  $\text{CH}_2\text{Cl}_2$  was used as the eluent to afford **I3** as a yellow solid (0.29 g, 55 %). m.p., 147.5–149.1 °C.  $^1\text{H}$  NMR (400 MHz,  $\text{CDCl}_3$ ):  $\delta$  7.91 (d,  $J = 7.3$  Hz, 2H), 7.86 (d,  $J = 6.92$  Hz, 2H), 7.57 (s, 2H), 7.40 (m, 4H), 5.42 (s, 2H), 3.52 (s, 4H).  $^{13}\text{C}$  NMR (100 MHz,  $\text{CDCl}_3$ ):  $\delta$  150.5, 141.0, 140.2, 138.0, 136.0,

125.8, 124.8, 124.6, 124.0, 122.5, 103.5, 40.3. HRMS (ESI-TOF)  $m/z$ :  $[M + H]^+$  Calcd for  $C_{24}H_{17}N_4S_3$  457.0615; Found 457.0615.

**General Procedure for the Synthesis of BN-PhTh, BN-BTTh and BN-BTBTh.**

Dichlorophenylborane was added to a solution of **I1-I3** and triethylamine in *o*-dichlorobenzene under nitrogen. The reaction mixture was heated to 180 °C for 12 h. After cooling to the room temperature, and the solvent was evaporated in vacuo and the product was purified by chromatography on silica gel to give product **BN-PhTh**, **BN-BTTh** and **BN-BTBTh**.

**4,9-Diphenyl-4,6,7,9-tetrahydrothieno[3',2':3,4][1,2]azaborinino[1,6,5-**

**de]thieno[3',2':3,4] [1,2] azaborinino [5,6,1-*ij*]quinoxaline (BN-PhTh). I1** (0.50 g, 1.68 mmol), *o*-DCB (10 mL), dichlorophenylborane (0.80 g, 5.04 mmol) and triethylamine (0.7 mL, 5.04 mmol) were used, and  $CH_2Cl_2/n$ -hexane (v/v, 1:5) was used as the eluent to give product **BN-PhTh** as white powder (0.65 g, 82%). m.p., 206.4–207.8 °C.  $^1H$  NMR (400 MHz,  $CDCl_3$ ):  $\delta$  7.96 (s, 2H), 7.65-7.60 (m, 4H), 7.49-7.44 (m, 5H), 7.43-7.36 (m, 5H), 4.35 (s, 4H).  $^{13}C$  NMR (100 MHz,  $CDCl_3$ ):  $\delta$  151.5, 133.1, 132.6, 129.0, 128.2, 128.1, 124.6, 121.5, 119.5, 47.2. HRMS (ESI-TOF)  $m/z$ :  $[M + H]^+$  Calcd for  $C_{28}H_{21}B_2N_2S_2$  471.1332; Found 471.1342.

**4,9-Diphenyl-4,6,7,9-tetrahydro-[1,2,5]thiadiazolo[3,4g]thieno[3',2':3,4][1,2]azaborinino [1,6,5-*de*]thieno[3',2':3,4][1,2]azaborinino[5,6,1-*ij*]quinoxaline (BN-BTTh). I2** (0.50 g, 1.40 mmol), *o*-DCB (10 mL), dichlorophenylborane (0.66 g, 4.20 mmol) and triethylamine (0.60 mL, 4.20 mmol) were used, and  $CH_2Cl_2/n$ -hexane (v/v, 1:5) was used as the eluent to give product **BN-BTTh** as orange powder (0.48 g, 65%). m.p. > 300 °C.  $^1H$  NMR (400 MHz,  $CDCl_3$ ):  $\delta$  7.66 (m, 6H), 7.53-7.43 (m, 8H), 4.46 (s, 4H).  $^{13}C$  NMR (100 MHz,  $CDCl_3$ ):  $\delta$  149.1, 148.2, 133.1, 132.7, 131.4, 129.0, 128.5, 128.2, 112.2, 47.6. HRMS (ESI-TOF)  $m/z$ :  $[M + H]^+$  Calcd for  $C_{28}H_{19}B_2N_4S_3$  529.0958; Found 529.0968.

**5,10-Diphenyl-5,7,8,10-tetrahydrobenzo[4',5']thieno[3',2':3,4][1,2]azaborinino[1,6,5-*de*]benzo[4',5']thieno[3',2':3,4][1,2]azaborinino[5,6,1-*ij*][1,2,5]thiadiazolo[3,4-*g*]quinoxaline (BN-BTbTh). I3** (0.50 g, 1.10 mmol), *o*-DCB (10 mL), dichlorophenylborane (0.69 g, 4.40 mmol) and triethylamine (0.65 mL, 4.40 mmol) were used, and CH<sub>2</sub>Cl<sub>2</sub>/*n*-hexane (v/v, 1:5) was used as the eluent to give product **BN-BTbTh** as yellow powder (0.43 g, 62%). Solid-state <sup>13</sup>C NMR (300 MHz):  $\delta$  149.5, 142.9, 141.1, 133.1, 129.9, 123.3, 118.0, 111.4, 46.7. HRMS (ESI-TOF) *m/z*: [M + H]<sup>+</sup> Calcd for C<sub>36</sub>H<sub>23</sub>B<sub>2</sub>N<sub>4</sub>S<sub>3</sub> 629.1271; Found: 629.1283.

**Table S1.** Crystal Data of **BN-PhTh** (CCDC: 1817703).

|                          |                                                                              |
|--------------------------|------------------------------------------------------------------------------|
| <b>Experical formula</b> | C <sub>28</sub> H <sub>20</sub> B <sub>2</sub> N <sub>2</sub> S <sub>2</sub> |
| <b>Space group</b>       | Pna2 <sub>1</sub>                                                            |
| <b>Cell lengths</b>      | a/Å 11.9322 (5) b/Å 12.5611(4) c/Å 30.2148 (9)                               |
| <b>Cell angles</b>       | $\alpha$ /° 90.00 $\beta$ /° 90.00 $\gamma$ /° 90.00                         |
| <b>Cell volume</b>       | 4528.64 /Å <sup>3</sup>                                                      |
| <b>Z, Z'</b>             | Z: 8 Z': 0                                                                   |
| <b>R-Factor (%)</b>      | 4.68                                                                         |

**Table S2.** Crystal Data of **BN-BTTh** (CCDC:1817704).

|                          |                                                                              |
|--------------------------|------------------------------------------------------------------------------|
| <b>Experical formula</b> | C <sub>28</sub> H <sub>18</sub> B <sub>2</sub> N <sub>4</sub> S <sub>3</sub> |
| <b>Space group</b>       | P-1                                                                          |
| <b>Cell lengths</b>      | a/Å 7.816 (4) b/Å 12.150(5) c/Å 12.764 (6)                                   |
| <b>Cell angles</b>       | $\alpha$ /° 91.877 (9) $\beta$ /° 92.37 (2) $\gamma$ /° 91.526 (14)          |
| <b>Cell volume</b>       | 1209.96 /Å <sup>3</sup>                                                      |
| <b>Z, Z'</b>             | Z: 2 Z': 0                                                                   |
| <b>R-Factor (%)</b>      | 3.41                                                                         |

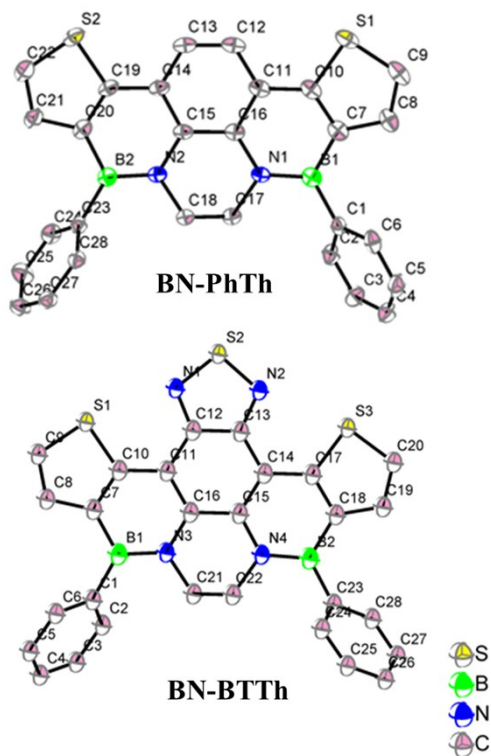

**Fig. S1** ORTEP diagrams for the molecular structure of **BN-PhTh** and **BN-BTTh**. Thermal ellipsoids are drawn at the 50% probability level. Hydrogen atoms have been omitted for the sake of clarity.

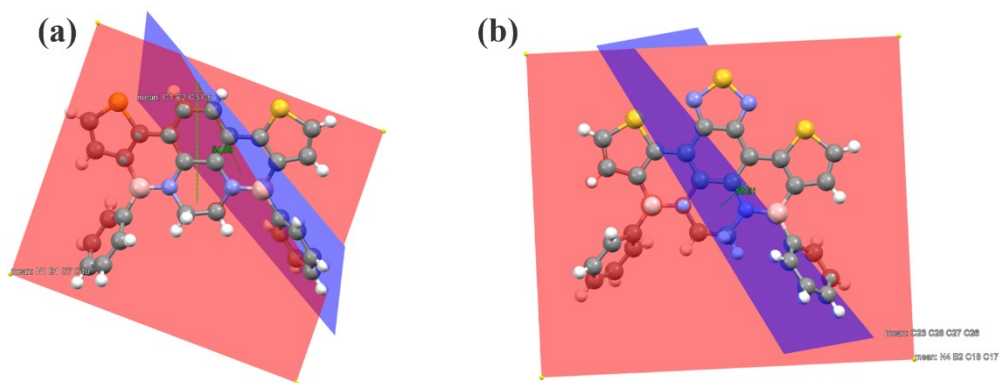

**Fig. S2** Dihedral angles of (a) **BN-PhTh** and (b) **BN-BTTh**.



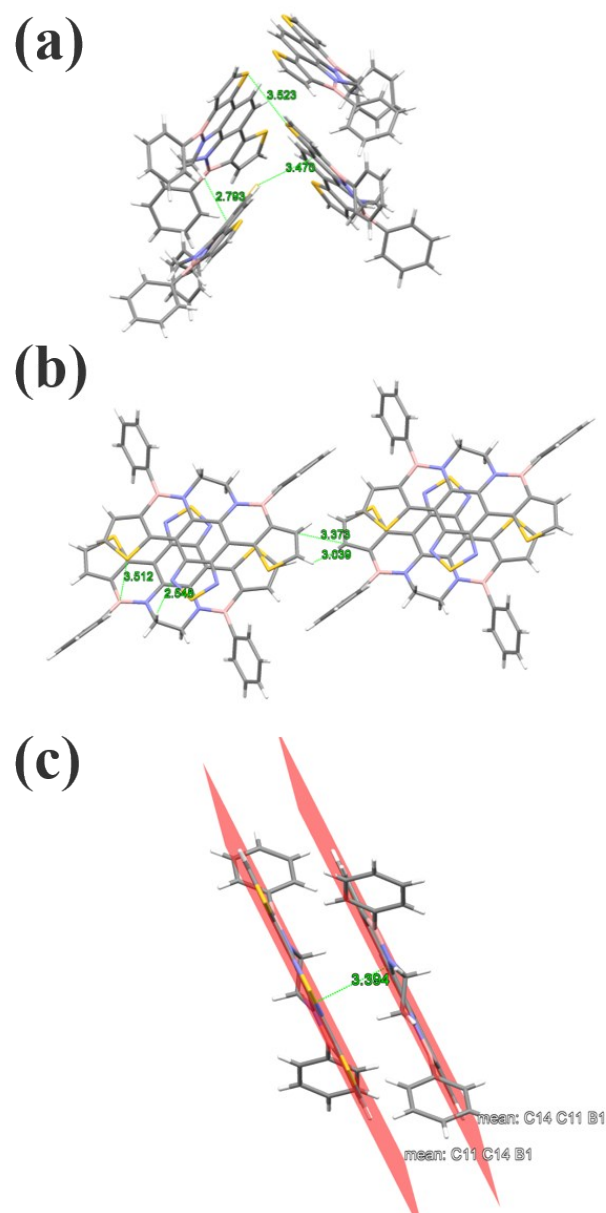

**Fig. S3** Multiple intermolecular interactions of (a) **BN-PhTh** (b) **BN-BTTh** existed in the crystals, including  $S \cdots S$ ,  $S \cdots \pi$ ,  $N-H \cdots \pi$ ,  $B \cdots S-C$  and  $C-H \cdots \pi$  interactions. (c) The distance between the rigid planes of two molecules of **BN-BTTh**.

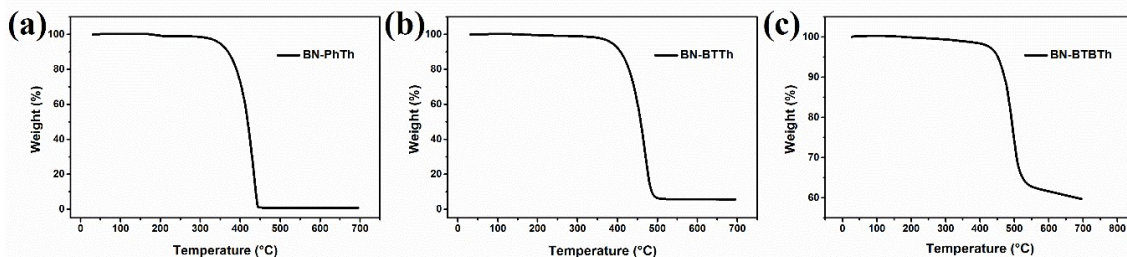

**Fig. S4** Thermogravimetric analysis (TGA) of (a) **BN-PhTh** (5% weight loss: 348 °C), (b) **BN-BTTh** (5% weight loss: 392 °C) and (c) **BN-BTBTh** (5% weight loss: 440 °C).

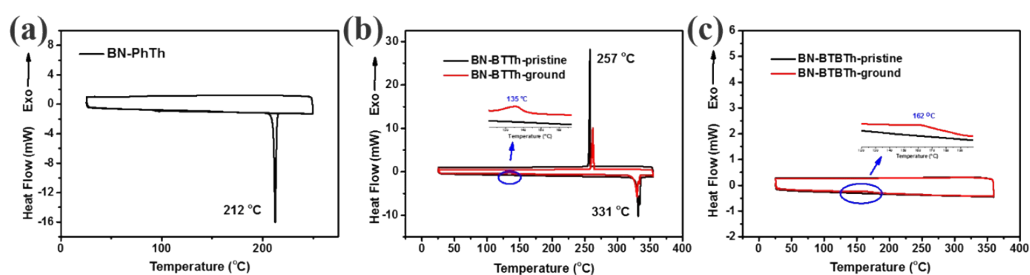

**Fig. S5** DSC traces of (a) **BN-PhTh**, (b) **BN-BTTh** and (c) **BN-BTBTh**.

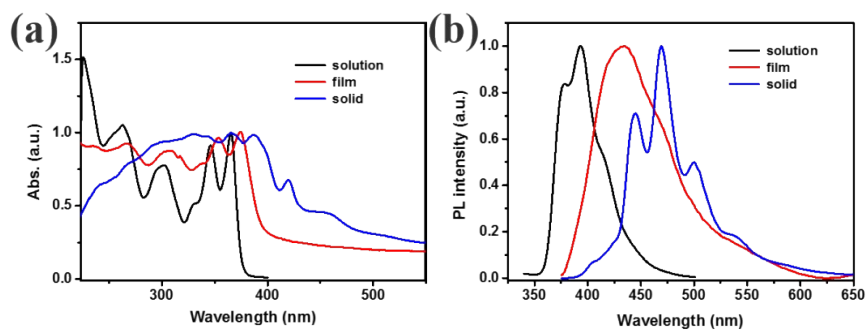

**Fig. S6** (a) UV-vis absorption spectra, (b) fluorescence spectra of **BN-PhTh** in  $\text{CH}_2\text{Cl}_2$ , in film and in solid states.

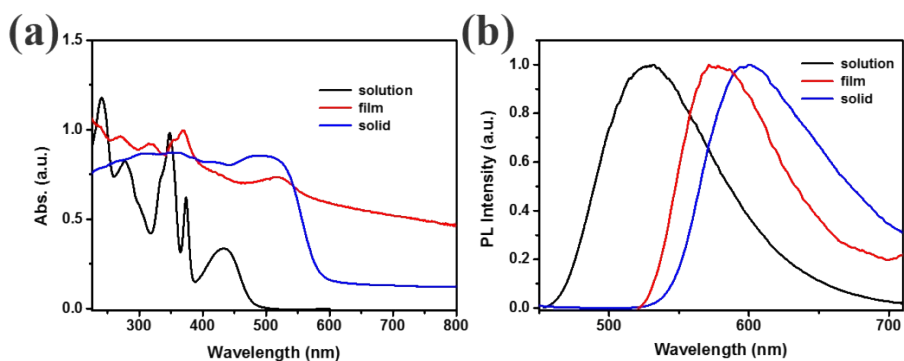

**Fig. S7** (a) UV-vis absorption spectra, (b) fluorescence spectra of **BN-BTTh** in  $\text{CH}_2\text{Cl}_2$ , in film and in solid states.

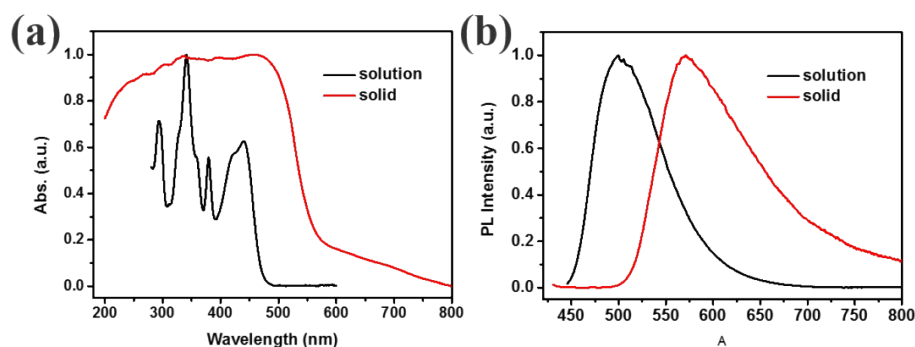

**Fig. S8** (a) UV-vis absorption spectra, (b) fluorescence spectra of **BN-BTBTh** in  $\text{CH}_2\text{Cl}_2$  and in solid states.

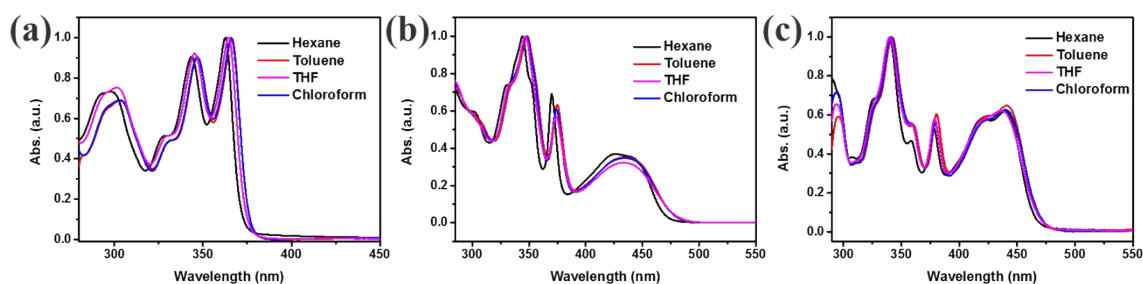

**Fig. S9** UV-vis absorption spectra of (a) **BN-PhTh**, (b) **BN-BTTh** and (c) **BN-BTBTh** in different solvents.

**Table S3. The Fluorescence Quantum Yields ( $\Phi_F$ ) of BN-PhTh, BN-BTTh and BN-BTBTh in Different Solvents**

|            | Fluorescence Quantum Yields ( $\Phi_F$ ) <sup>a</sup> |         |          |
|------------|-------------------------------------------------------|---------|----------|
|            | BN-PhTh                                               | BN-BTTh | BN-BTBTh |
| Hexane     | 36%                                                   | 45%     | 42%      |
| Toluene    | 31%                                                   | 35%     | 37%      |
| THF        | 27%                                                   | 30%     | 26%      |
| Chloroform | 25%                                                   | 28%     | 26%      |

<sup>a</sup> Measured using 9,10-diphenylanthracene in cyclohexane as standard (0.90)

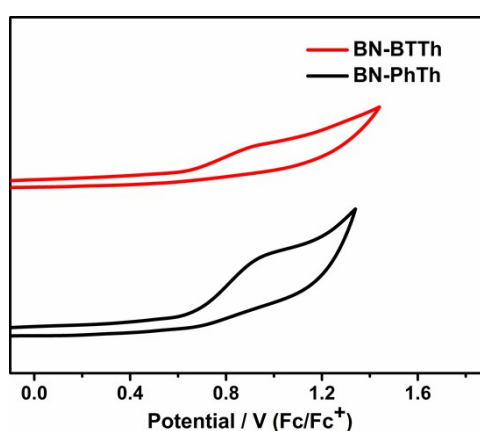

**Fig. S10** CV curves of **BN-PhTh** and **BN-BTTh** in  $\text{CH}_2\text{Cl}_2$  (1 mM) with 0.1 M  $n\text{-Bu}_4\text{NPF}_6$  as supporting electrolyte.

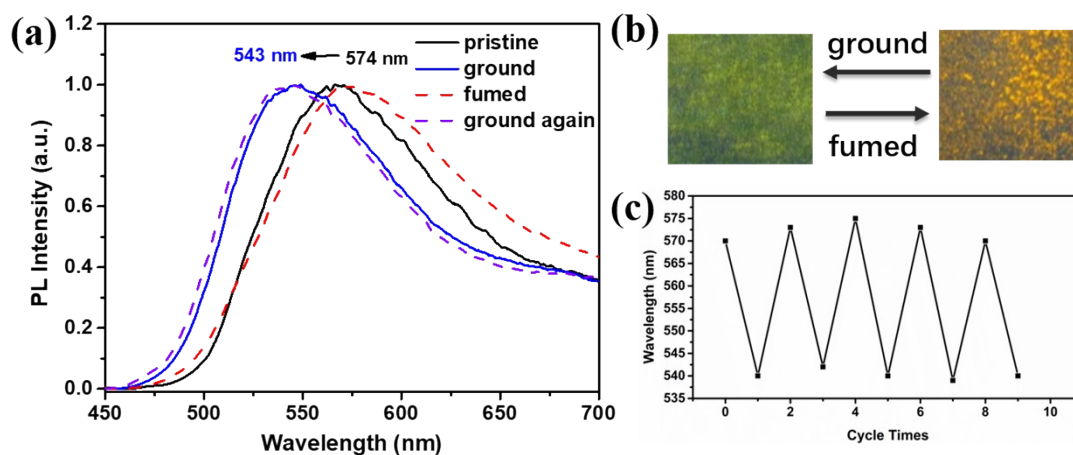

**Fig. S11** (a) Normalized FL spectra of **BN-BTBTh** in different solid states excited at 435 nm. (b) The photographs of **BN-BTBTh** in different solid states under UV illumination at 365 nm.

(c) Switching the maximum solid-state emission wavelength of **BN-BTBTh** by repeated grinding-fuming processes.

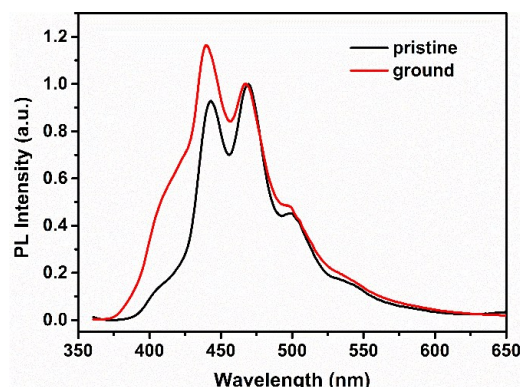

**Fig. S12** Normalized FL spectra of **BN-PhTh** in different solid states excited at 345 nm.

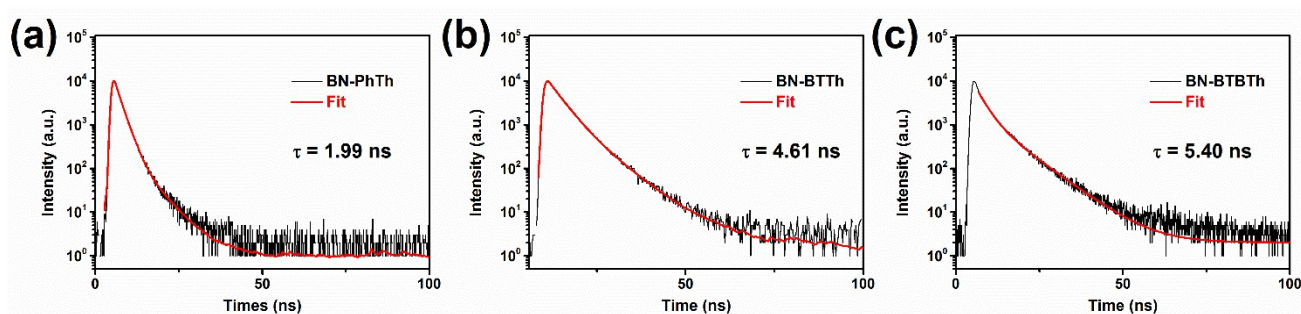

**Fig. S13** Fluorescence decay curve (black line) of (a) **BN-PhTh** (b) **BN-BTTh** and (c) **BN-BTBTh** in pristine solid state. Red line: fitting of the fluorescence decay curve.

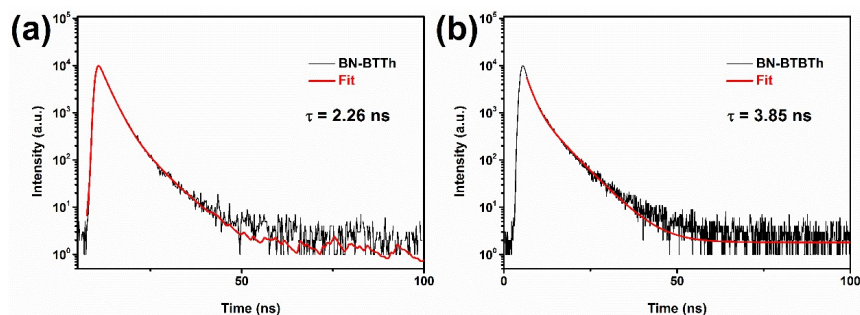

**Fig. S14** Fluorescence decay curve (black line) of (a) **BN-BTTh** and (b) **BN-BTBTh** in ground solid state. Red line: fitting of the fluorescence decay curve.

**Table S4. The Fluorescence Quantum Yields ( $\Phi_F$ ) of BN-PhTh, BN-BTTh and BN-BTBTh in Solid States**

| Compound | $\lambda_{em}$ (nm) | $\Phi_F$ pristine (%) <sup>a</sup> | $\Phi_F$ ground (%) <sup>a</sup> |
|----------|---------------------|------------------------------------|----------------------------------|
| BN-PhTh  | 345                 | 29.58                              | --                               |
| BN-BTTh  | 435                 | 4.02                               | 8.55                             |
| BN-BTBTh | 435                 | 35.20                              | 40.25                            |

<sup>a</sup> The fluorescence quantum yields were measured with an absolute fluorescence quantum yield spectrometer.

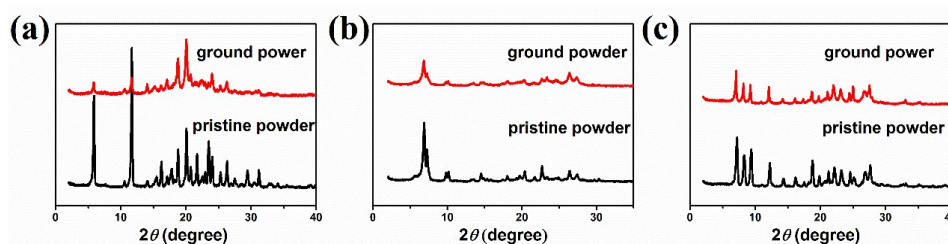

**Fig. S15** PXRD patterns of (a) BN-PhTh, (b) BN-BTTh and (c) BN-BTBTh in different solid states.

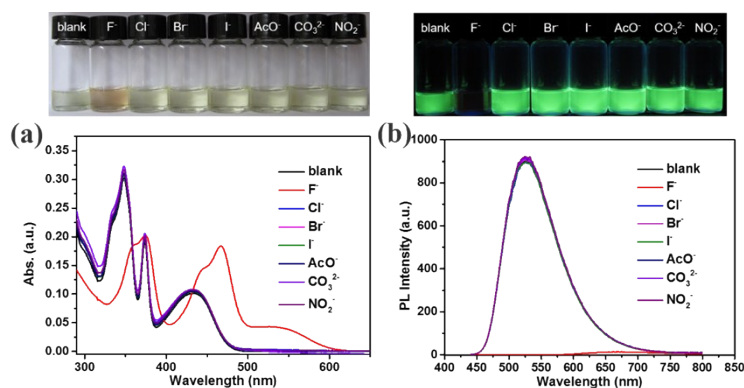

**Fig. S16** BN-BTTh in THF ( $1 \times 10^{-5}$  M) with addition of different anions (100 eq.): (a) Photographs under visible light and absorption spectra; (b) Photographs under UV light at 365 nm and fluorescence spectra ( $\lambda_{ex} = 435$  nm).

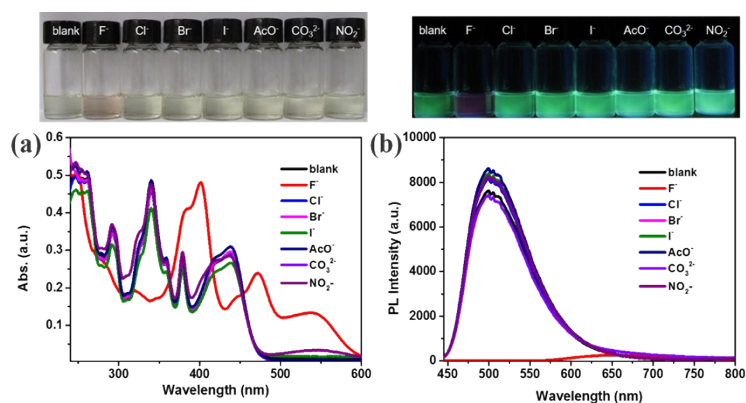

**Fig. S17** BN-BTBTh in THF ( $1 \times 10^{-5}$  M) with addition of different anions (100 eq.): (a) Photographs under visible light and absorption spectra; (b) Photographs under UV light at 365 nm and fluorescence spectra ( $\lambda_{\text{ex}} = 435$  nm).

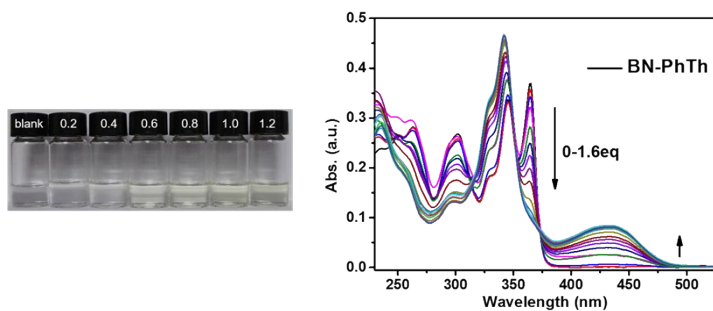

**Fig. S18** BN-PhTh in THF ( $1 \times 10^{-5}$  M) upon addition of TBAF photographs under visible light, and absorption spectra.

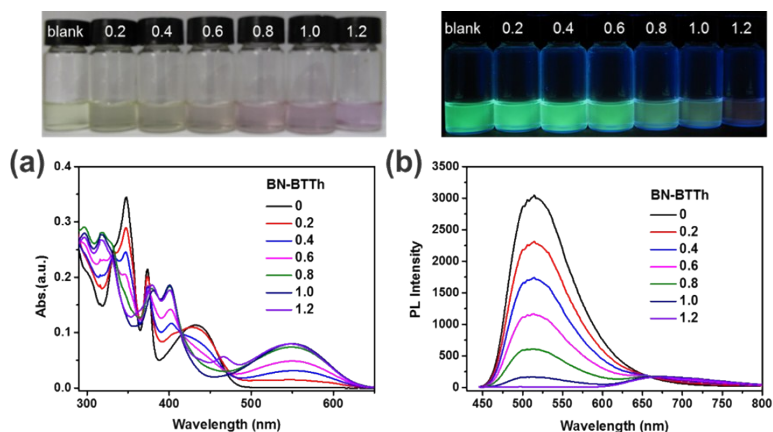

**Fig. S19** (a) Photographs under visible light and absorption titration spectra of **BN-BTTh** ( $1 \times 10^{-5}$  M in THF) upon addition of TBAF. (b) Photographs under UV light at 365 nm and fluorescence titration spectra of **BN-BTTh** ( $1 \times 10^{-5}$  M in THF) upon addition of TBAF ( $\lambda_{\text{ex}} = 435$  nm).

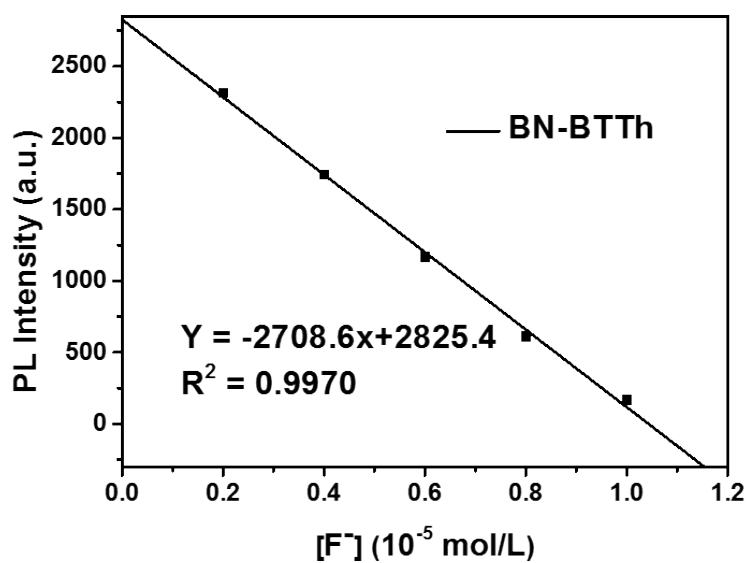

**Fig. S20** The fluorescent intensity of **BN-BTTh** at 515 nm in different concentration of fluoride ( $\lambda_{\text{ex}} = 435$  nm).

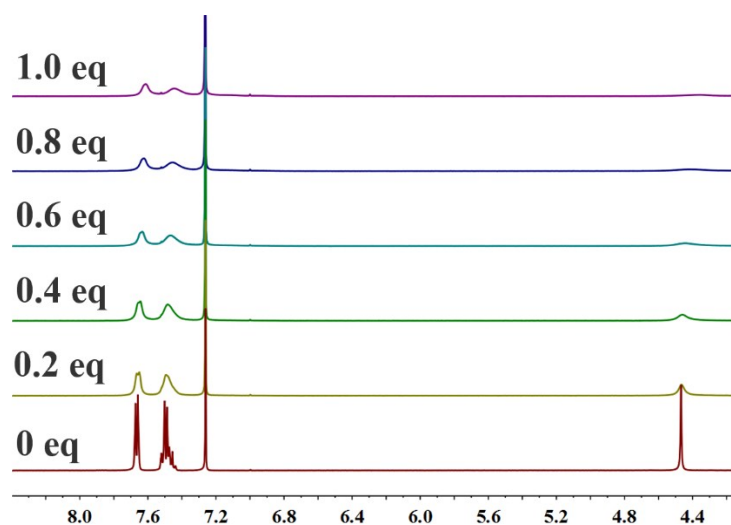



**Fig. S21**  $^1\text{H}$  NMR spectra of **BN-BTTh** (5 mM) in  $\text{CDCl}_3$  in the presence of various equivalents of TBAF.

**NMR and Mass Spectra:**

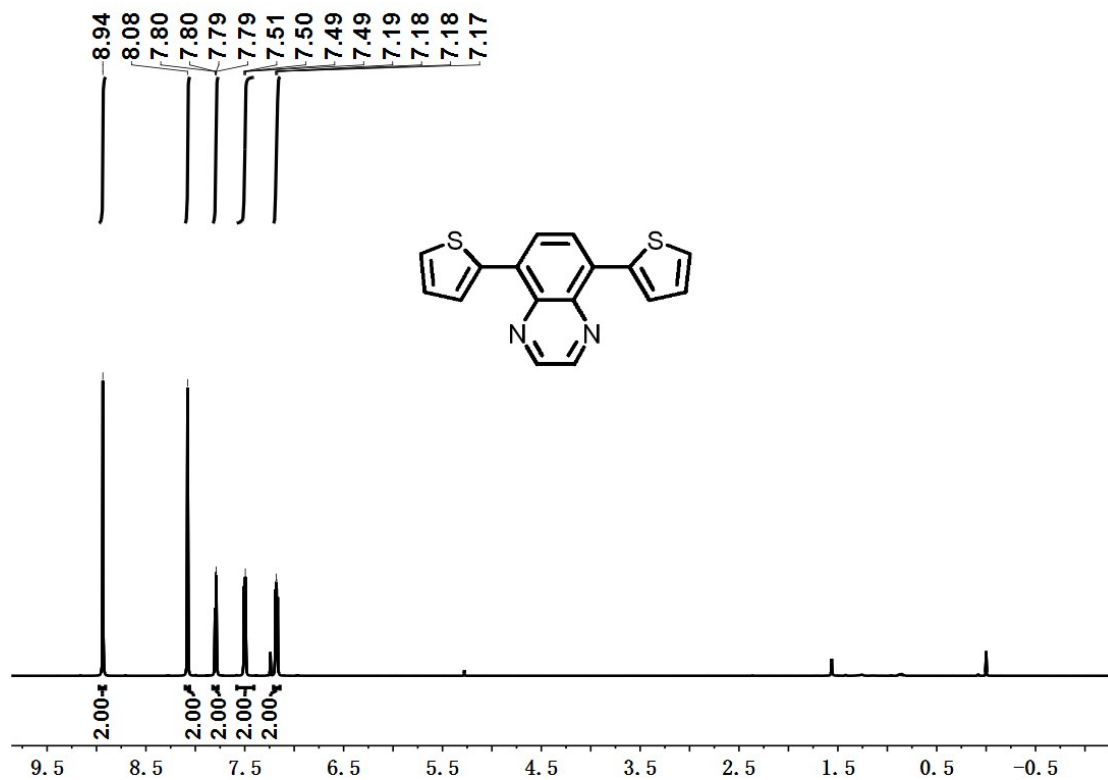

**Fig. S22**  $^1\text{H}$  NMR spectrum of compound **M1** in  $\text{CDCl}_3$ .

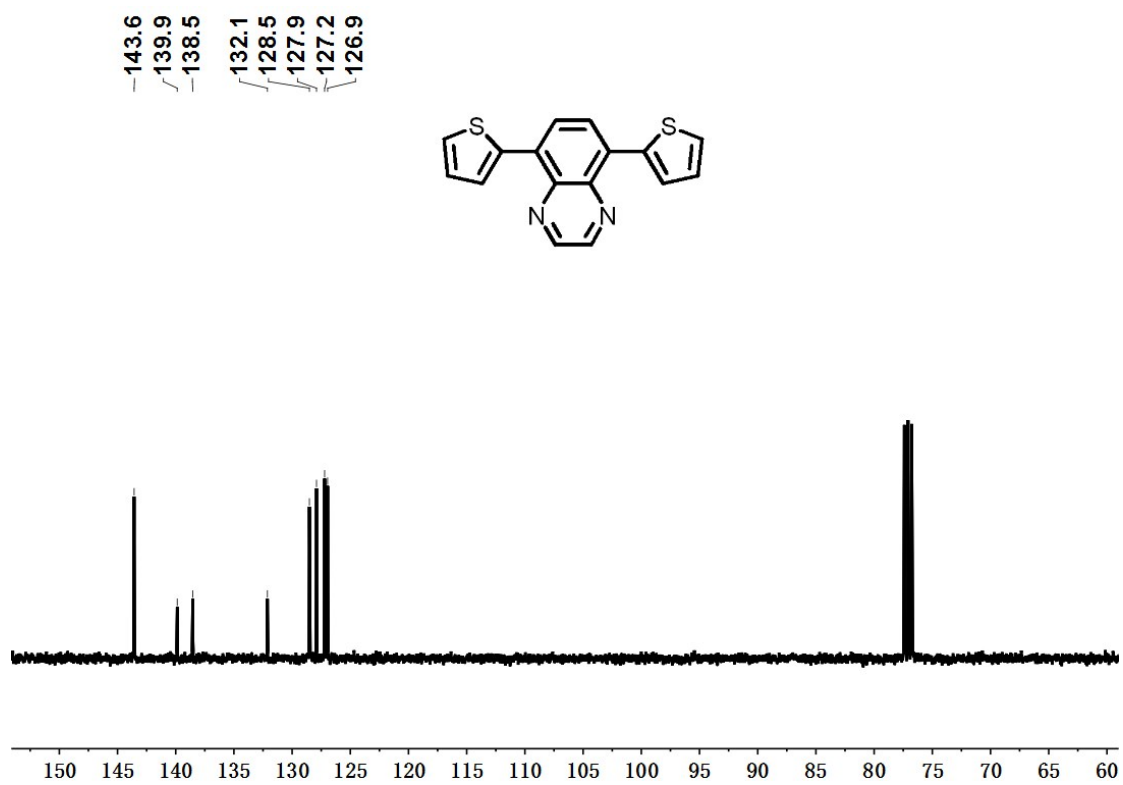

**Fig. S23** <sup>13</sup>C NMR spectrum of compound **M1** in CDCl<sub>3</sub>.

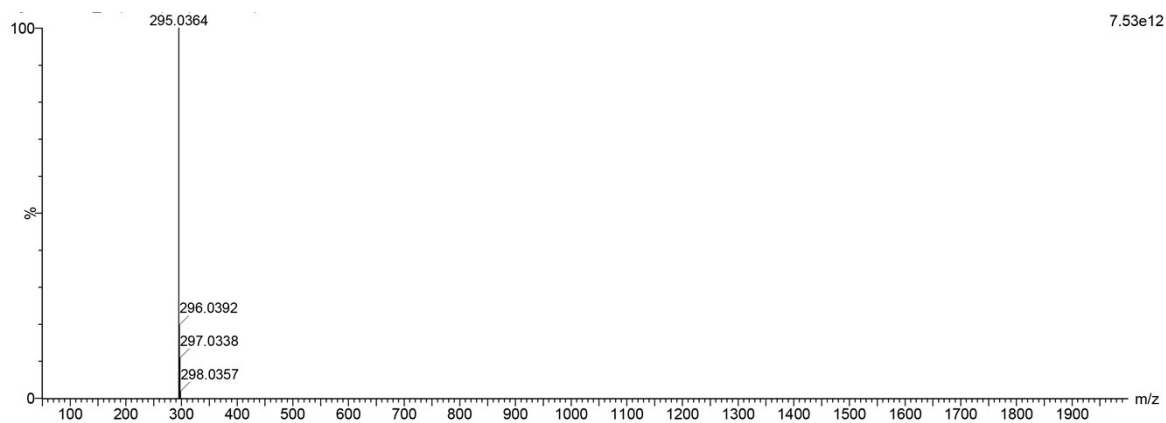

**Fig. S24** ESI-TOF spectrum of compound **M1**.

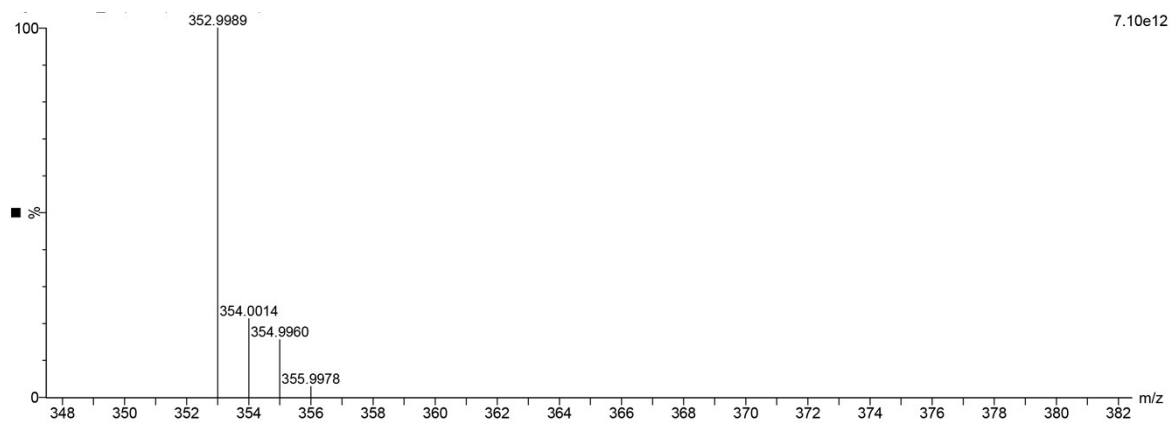

**Fig. S25** ESI-TOF spectrum of compound **M2**.

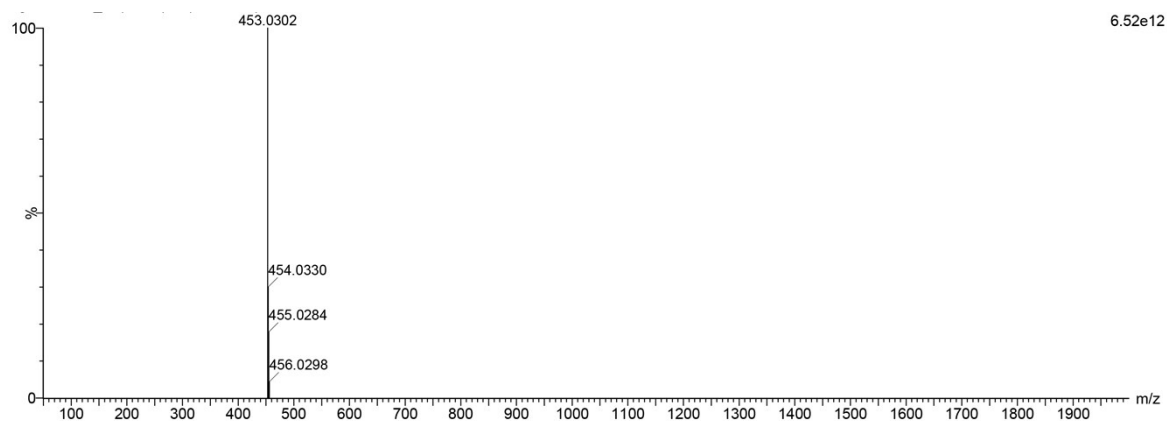

**Fig. S26** ESI-TOF spectrum of compound **M3**.

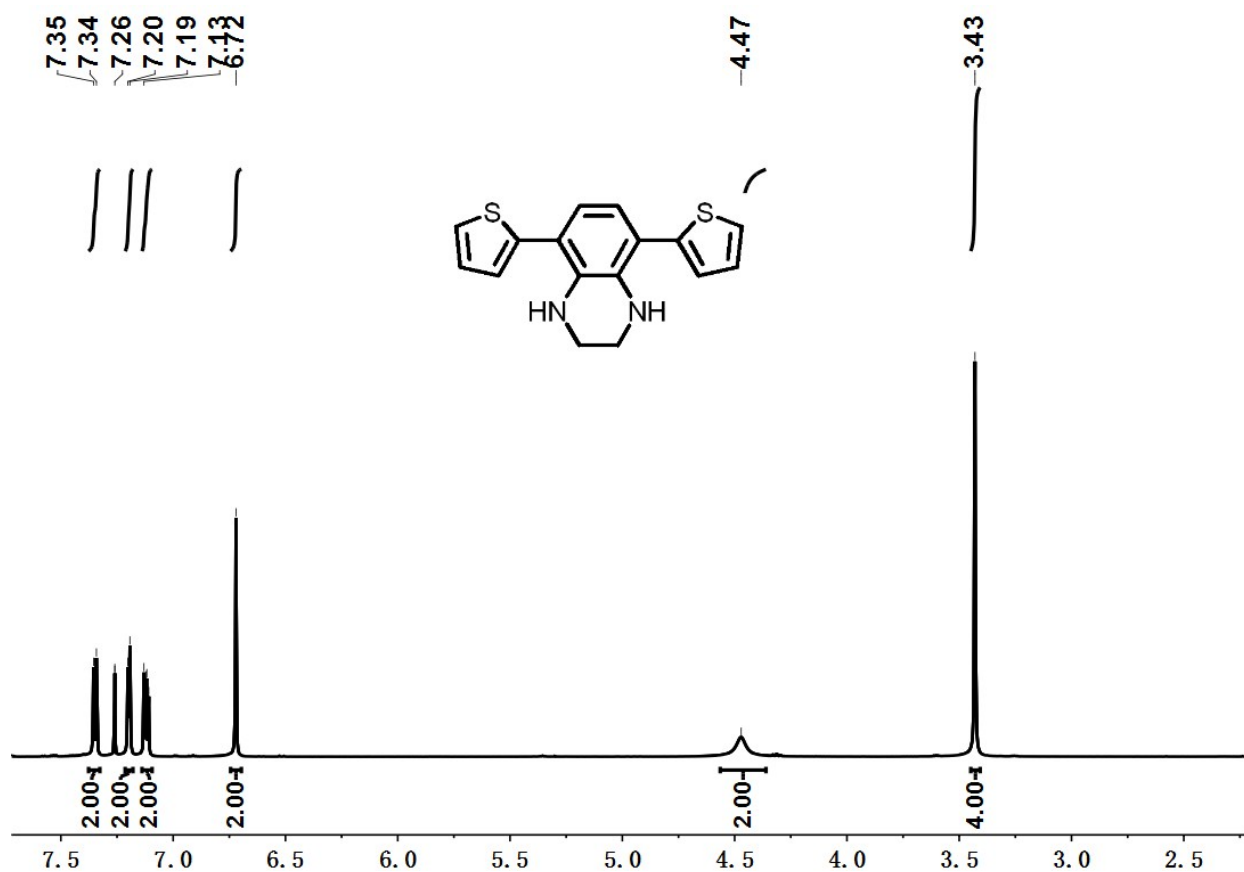

**Fig. S27** <sup>1</sup>H NMR spectrum of compound **I1** in CDCl<sub>3</sub>.

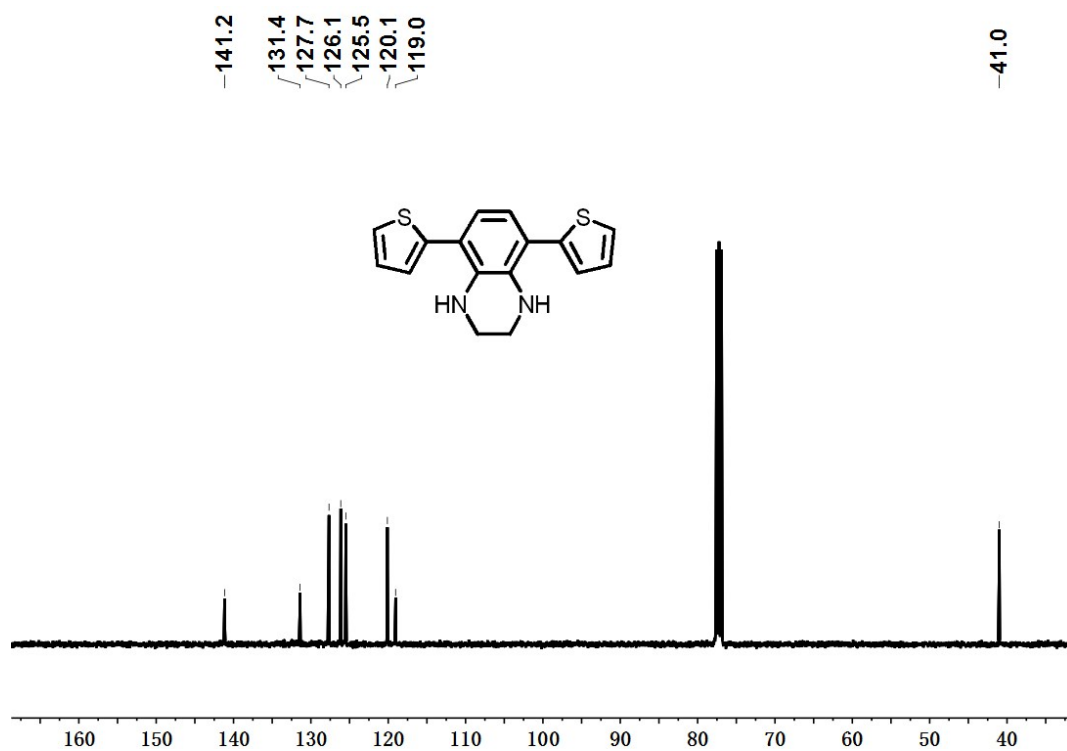

**Fig. S28** <sup>13</sup>C NMR spectrum of compound **II** in CDCl<sub>3</sub>.

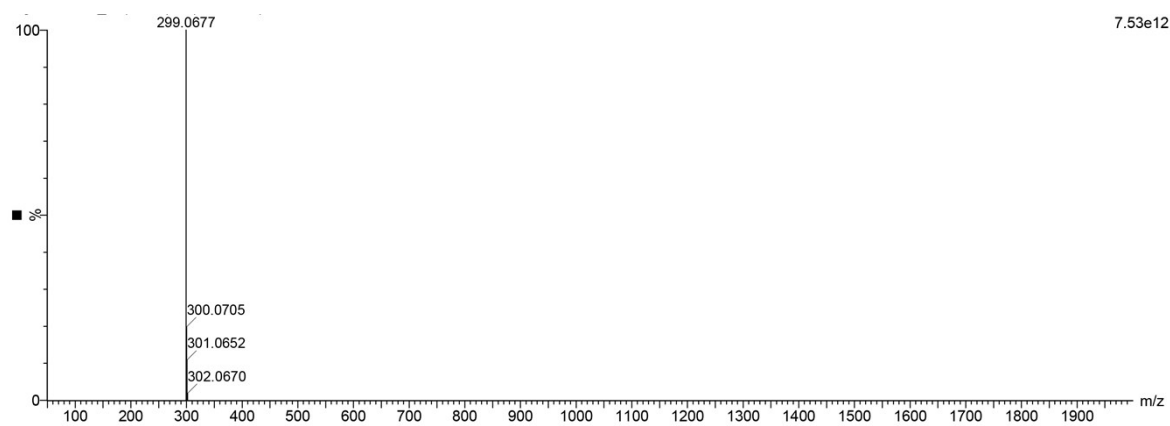

**Fig. S29** ESI-TOF spectrum of compound **II**.

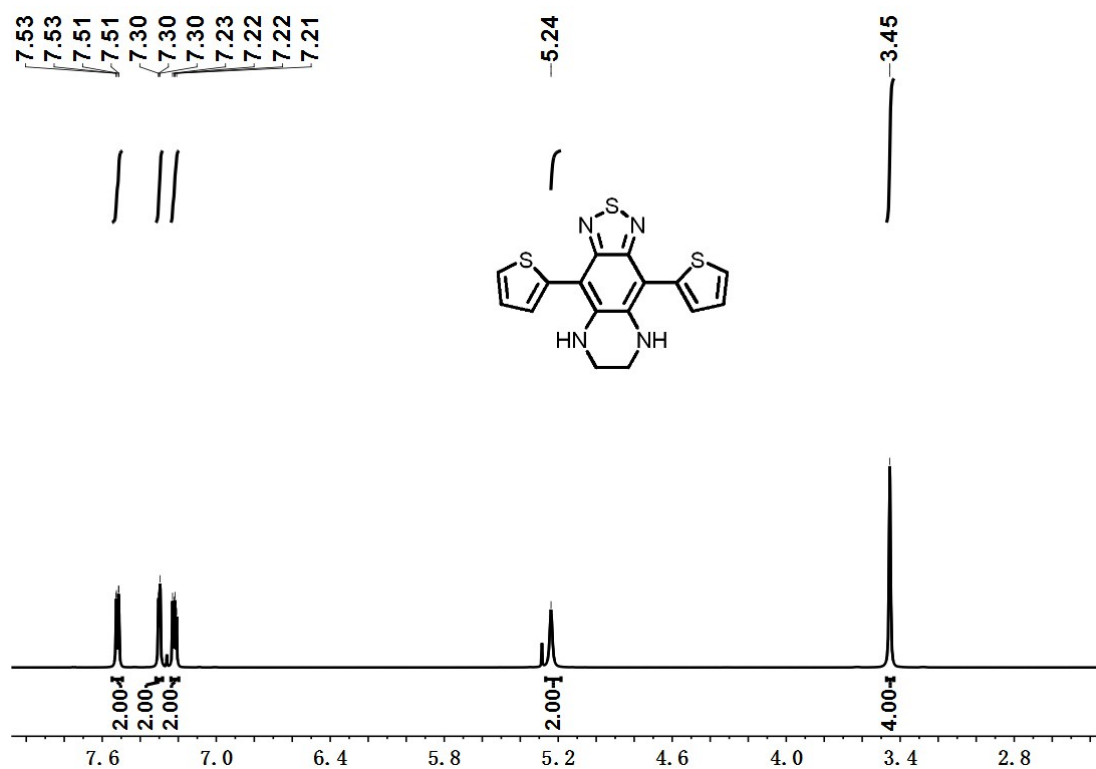

**Fig. S30**  $^1\text{H NMR}$  spectrum of compound **I2** in  $\text{CDCl}_3$ .

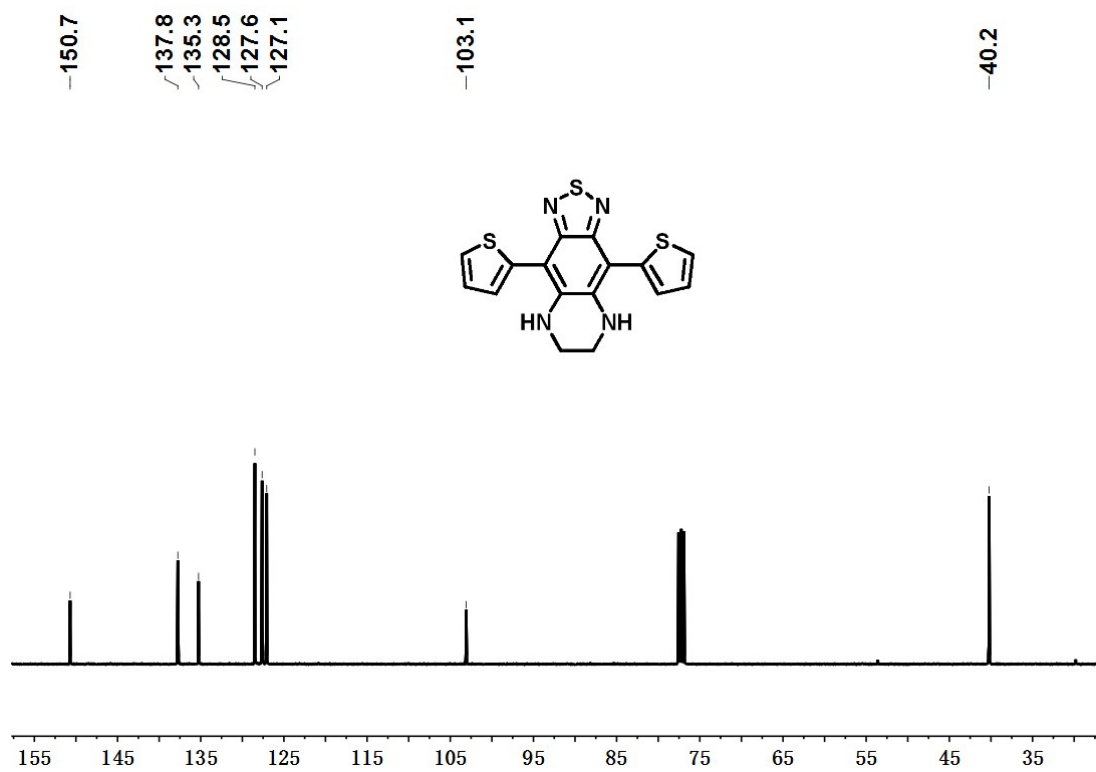

**Fig. S31**  $^{13}\text{C NMR}$  spectrum of compound **I2** in  $\text{CDCl}_3$ .

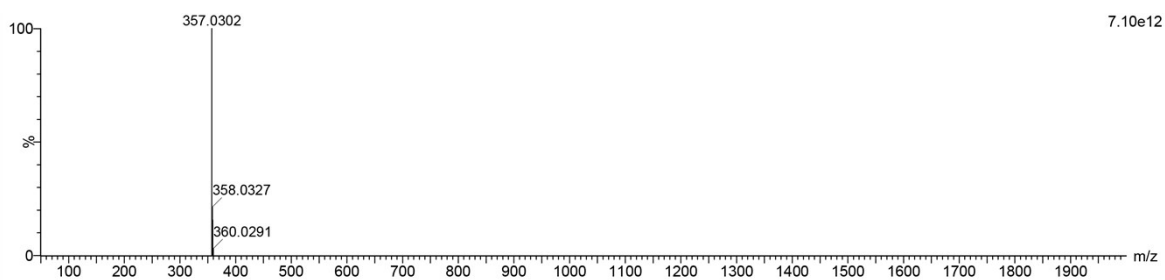

**Fig. S32** ESI-TOF spectrum of compound **I2**.

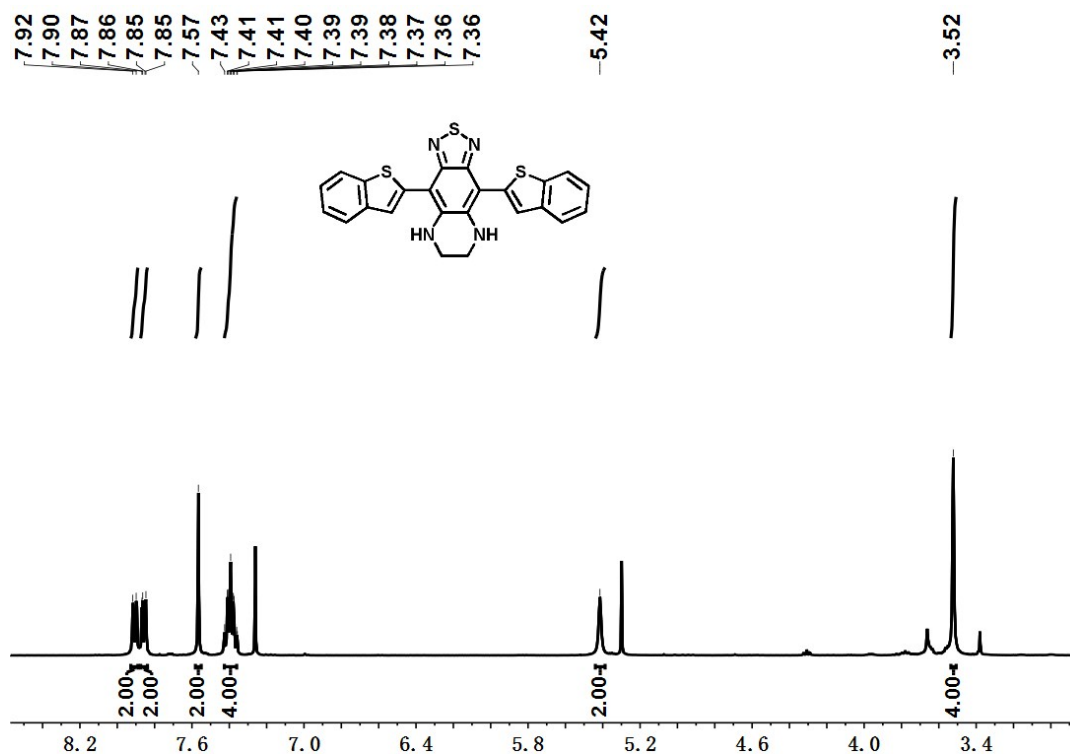

**Fig. S33** <sup>1</sup>H NMR spectrum of compound **I3** in CDCl<sub>3</sub>.

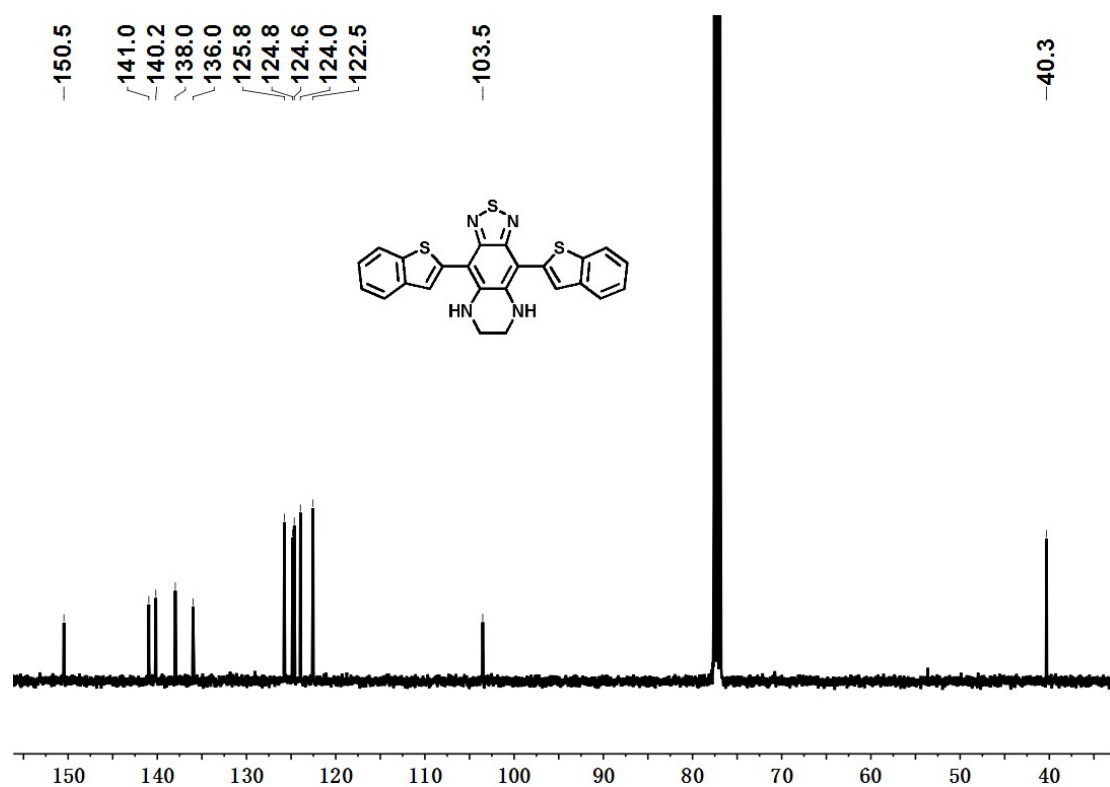

**Fig. S34** <sup>13</sup>C NMR spectrum of compound **I3** in CDCl<sub>3</sub>.

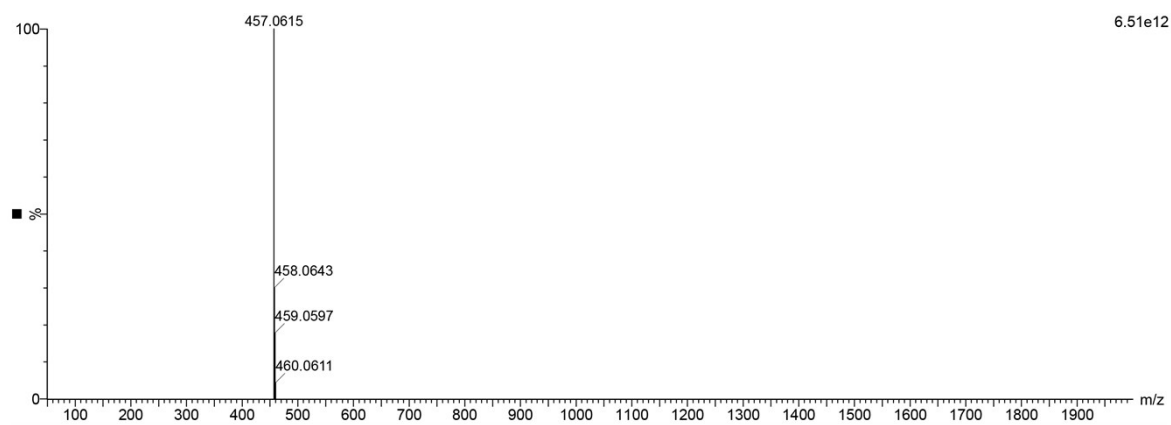

**Fig. S35** ESI-TOF spectrum of compound **I3**.

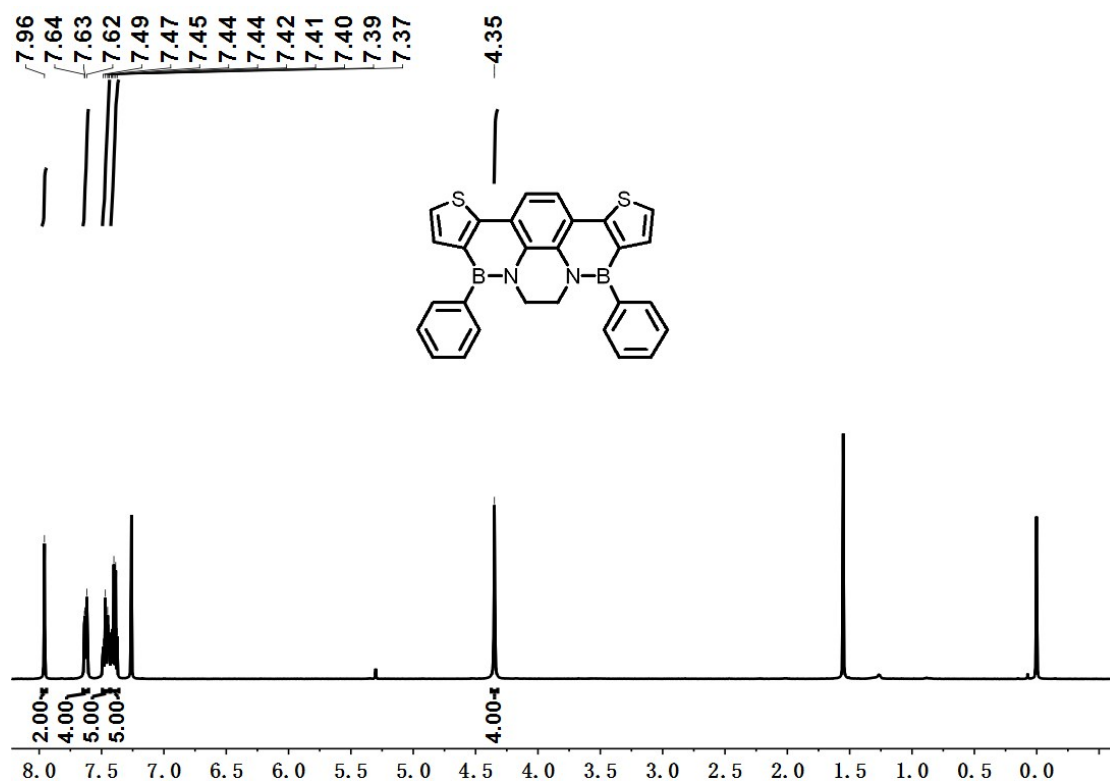

Fig. S36 <sup>1</sup>H NMR spectrum of BN-PhTh in CDCl<sub>3</sub>.

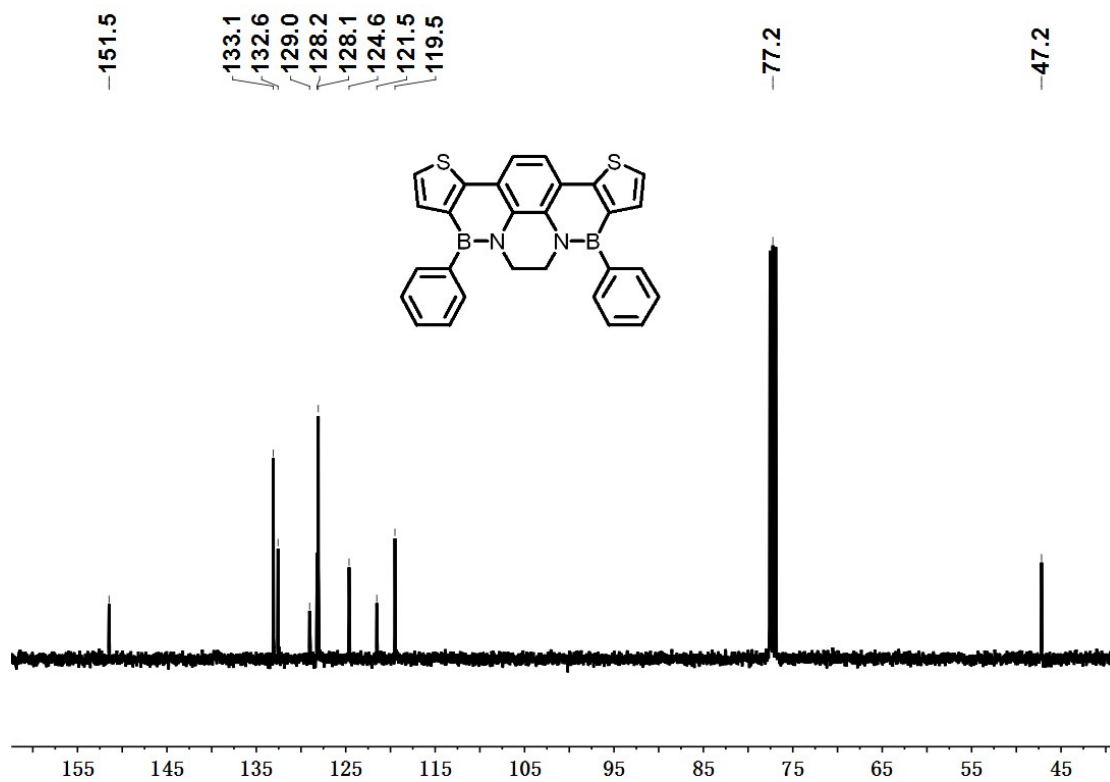

Fig. S37 <sup>13</sup>C NMR spectrum of BN-PhTh in CDCl<sub>3</sub>.



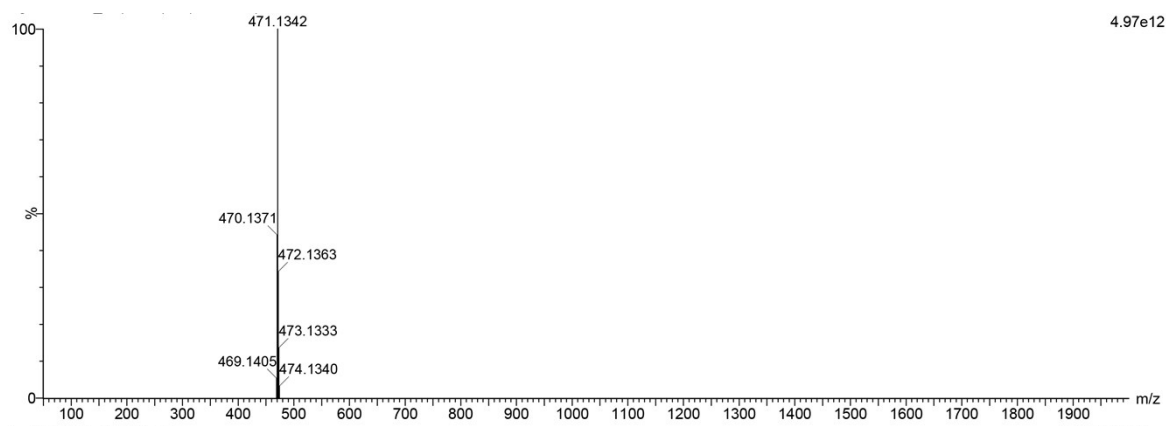

**Fig. S38** ESI-TOF spectrum of **BN-PhTh**.

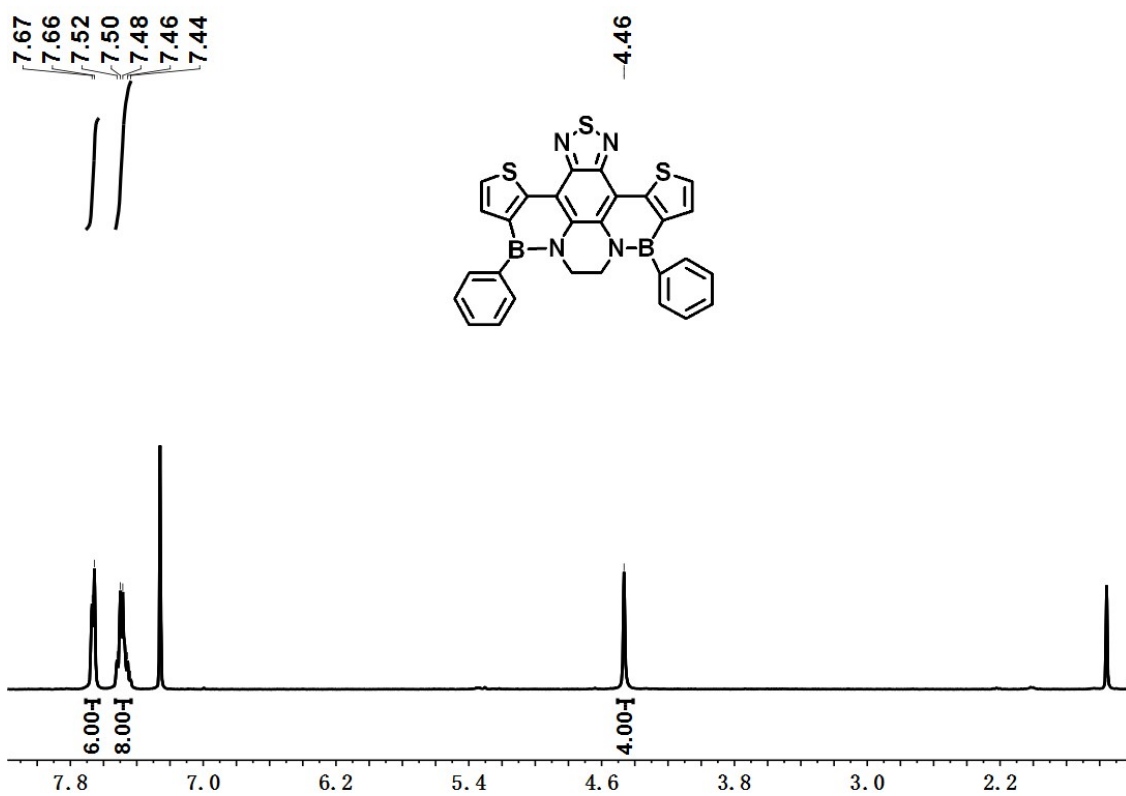

**Fig. S39** <sup>1</sup>H NMR spectrum of **BN-BTTh** in CDCl<sub>3</sub>.

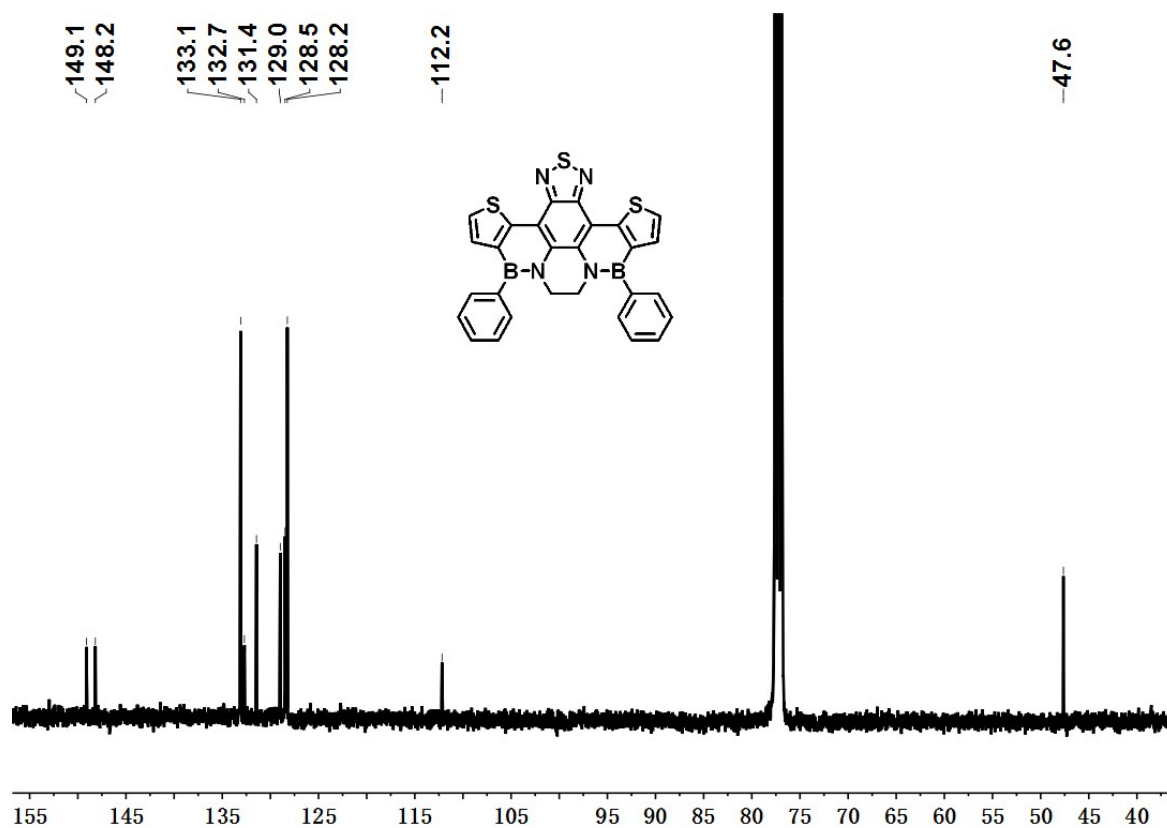

**Fig. S40** <sup>13</sup>C NMR spectrum of **BN-BTTh** in CDCl<sub>3</sub>.

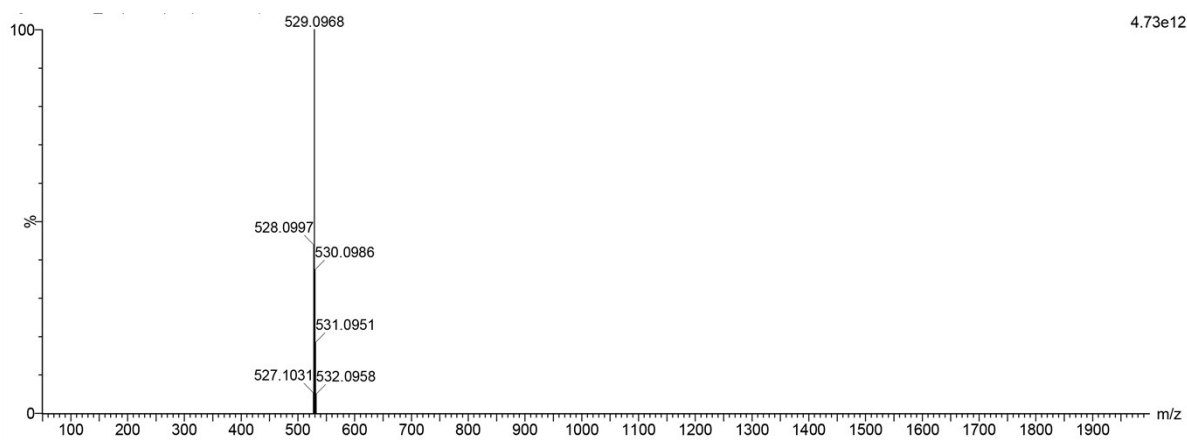

**Fig. S41** ESI-TOF spectrum of **BN-BTTh**.

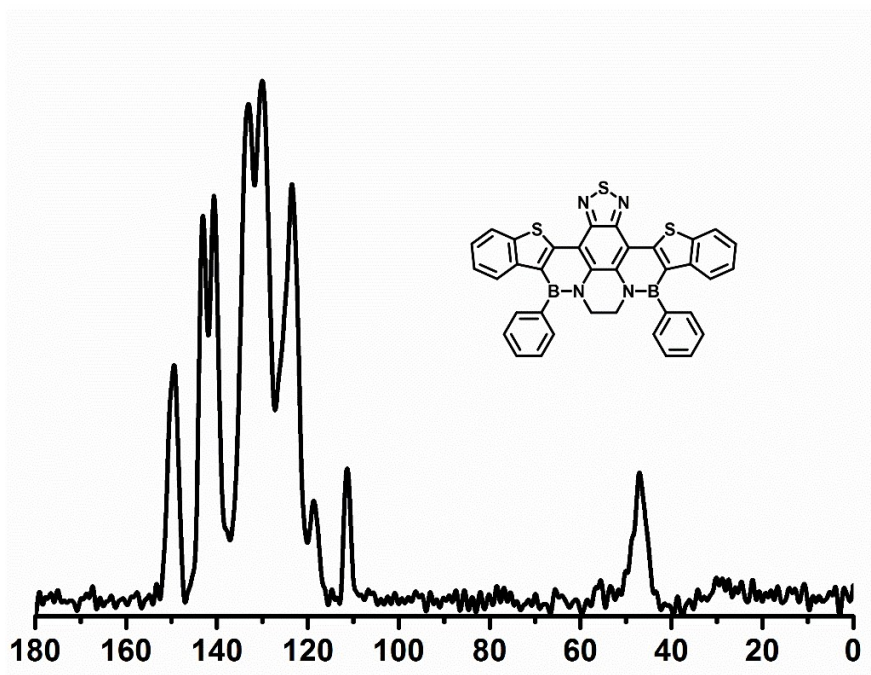

**Fig. S42**  $^{13}\text{C}$  NMR spectrum of **BN-BTBTh** in solid state.

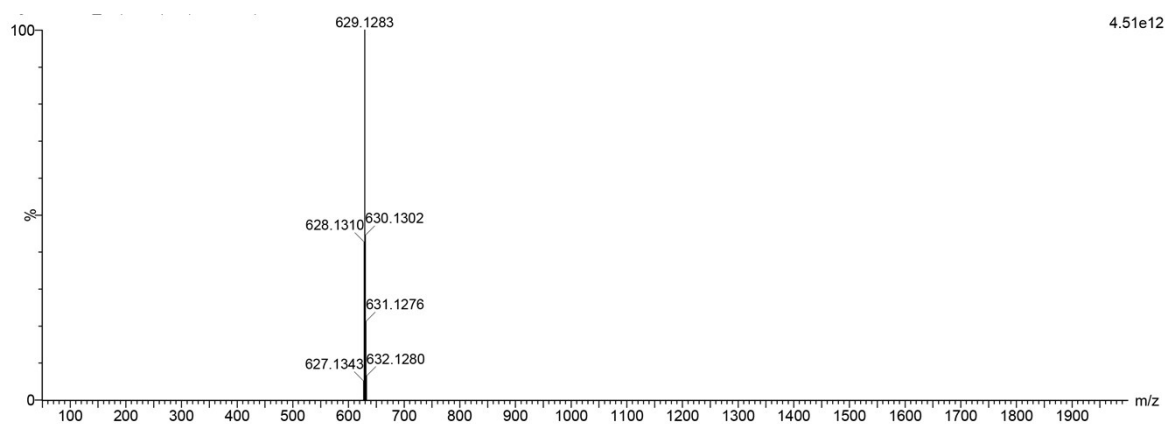

**Fig. S43** ESI-TOF spectrum of **BN-BTBTh**.

**Computational data for compounds BN-PhTh, BN-BTTh, BT-BTBTh:**

**Compound BN-PhTh**

**E = -2034.7717548 hartree**

| Center Number | Atomic Number | Atomic Type | Coordinates (Angstroms) |           |          |
|---------------|---------------|-------------|-------------------------|-----------|----------|
|               |               |             | X                       | Y         | Z        |
| 1             | 6             | 0           | -1.413246               | -2.106488 | 0.050568 |

|    |    |   |           |           |           |
|----|----|---|-----------|-----------|-----------|
| 2  | 6  | 0 | 0.718325  | -0.869789 | 0.004177  |
| 3  | 6  | 0 | -0.718328 | -0.869788 | -0.004205 |
| 4  | 6  | 0 | -1.413249 | -2.106486 | 0.050560  |
| 5  | 6  | 0 | -0.683362 | -3.318209 | 0.037827  |
| 6  | 6  | 0 | 0.683358  | -3.318211 | -0.037814 |
| 7  | 6  | 0 | -2.848683 | -2.090294 | 0.108114  |
| 8  | 6  | 0 | 2.848680  | -2.090296 | -0.108120 |
| 9  | 6  | 0 | -3.611953 | -0.927100 | 0.113612  |
| 10 | 6  | 0 | -5.017136 | -1.211203 | 0.207101  |
| 11 | 6  | 0 | -5.298879 | -2.542471 | 0.261641  |
| 12 | 16 | 0 | -3.856665 | -3.523165 | 0.206973  |
| 13 | 16 | 0 | 3.856662  | -3.523170 | -0.206938 |
| 14 | 6  | 0 | 5.298876  | -2.542477 | -0.261626 |
| 15 | 6  | 0 | 5.017133  | -1.211208 | -0.207120 |
| 16 | 6  | 0 | 3.611950  | -0.927102 | -0.113646 |
| 17 | 7  | 0 | 1.444116  | 0.330425  | 0.081665  |
| 18 | 7  | 0 | -1.444119 | 0.330426  | -0.081706 |
| 19 | 5  | 0 | 2.878164  | 0.408391  | 0.000025  |
| 20 | 6  | 0 | 3.648082  | 1.785992  | 0.042362  |
| 21 | 6  | 0 | 4.585504  | 2.051501  | 1.058657  |
| 22 | 6  | 0 | 5.312480  | 3.243162  | 1.089847  |
| 23 | 6  | 0 | 5.131993  | 4.199005  | 0.088799  |
| 24 | 6  | 0 | 4.219302  | 3.954989  | -0.939305 |
| 25 | 6  | 0 | 3.488004  | 2.766384  | -0.956346 |
| 26 | 5  | 0 | -2.878168 | 0.408390  | -0.000092 |
| 27 | 6  | 0 | -3.648082 | 1.785994  | -0.042388 |
| 28 | 6  | 0 | -3.487943 | 2.766386  | 0.956310  |
| 29 | 6  | 0 | -4.219237 | 3.954995  | 0.939308  |
| 30 | 6  | 0 | -5.131984 | 4.199014  | -0.088746 |
| 31 | 6  | 0 | -5.312529 | 3.243172  | -1.089784 |
| 32 | 6  | 0 | -4.585556 | 2.051507  | -1.058633 |
| 33 | 6  | 0 | 0.636443  | 1.512666  | 0.408838  |
| 34 | 6  | 0 | -0.636446 | 1.512672  | -0.408864 |
| 35 | 1  | 0 | -1.222467 | -4.260155 | 0.071601  |
| 36 | 1  | 0 | 1.222462  | -4.260158 | -0.071567 |
| 37 | 1  | 0 | -5.779883 | -0.440575 | 0.231720  |
| 38 | 1  | 0 | -6.265632 | -3.023414 | 0.334057  |
| 39 | 1  | 0 | 6.265629  | -3.023422 | -0.334026 |
| 40 | 1  | 0 | 5.779881  | -0.440581 | -0.231756 |
| 41 | 1  | 0 | 4.747547  | 1.313366  | 1.841421  |
| 42 | 1  | 0 | 6.022459  | 3.423505  | 1.893322  |
| 43 | 1  | 0 | 5.700737  | 5.125144  | 0.107004  |
| 44 | 1  | 0 | 4.078647  | 4.689190  | -1.728809 |
| 45 | 1  | 0 | 2.786252  | 2.592520  | -1.770493 |
| 46 | 1  | 0 | -2.786145 | 2.592522  | 1.770417  |
| 47 | 1  | 0 | -4.078535 | 4.689197  | 1.728803  |
| 48 | 1  | 0 | -5.700723 | 5.125156  | -0.106922 |
| 49 | 1  | 0 | -6.022550 | 3.423517  | -1.893221 |
| 50 | 1  | 0 | -4.747645 | 1.313372  | -1.841387 |

|    |   |   |           |          |           |
|----|---|---|-----------|----------|-----------|
| 51 | 1 | 0 | 0.384726  | 1.498792 | 1.478456  |
| 52 | 1 | 0 | 1.223022  | 2.408403 | 0.212526  |
| 53 | 1 | 0 | -1.223024 | 2.408406 | -0.212536 |
| 54 | 1 | 0 | -0.384732 | 1.498814 | -1.478483 |

### Compound BN-BTTh

E = -2541.246882 hartree

| Center Number | Atomic Number | Atomic Type | Coordinates (Angstroms) |           |           |
|---------------|---------------|-------------|-------------------------|-----------|-----------|
|               |               |             | X                       | Y         | Z         |
| 1             | 6             | 0           | -1.449362               | -1.593200 | 0.095239  |
| 2             | 6             | 0           | 0.728952                | -0.384538 | -0.024802 |
| 3             | 6             | 0           | -0.744062               | -0.384437 | -0.030052 |
| 4             | 6             | 0           | -1.472876               | -1.581934 | 0.097232  |
| 5             | 6             | 0           | -0.732130               | -2.811911 | 0.098774  |
| 6             | 6             | 0           | 0.700035                | -2.817782 | -0.046179 |
| 7             | 6             | 0           | -2.900475               | -1.550083 | 0.181117  |
| 8             | 6             | 0           | 2.877300                | -1.579807 | -0.169529 |
| 9             | 7             | 0           | 1.228674                | -4.037999 | -0.079602 |
| 10            | 7             | 0           | -1.267552               | -4.026778 | 0.179762  |
| 11            | 16            | 0           | -0.022031               | -5.107047 | 0.070943  |
| 12            | 6             | 0           | -3.633083               | -0.359265 | 0.144033  |
| 13            | 6             | 0           | -5.041182               | -0.593294 | 0.281371  |
| 14            | 6             | 0           | -5.353459               | -1.912974 | 0.409015  |
| 15            | 16            | 0           | -3.948347               | -2.945073 | 0.370825  |
| 16            | 16            | 0           | 3.912745                | -2.992195 | -0.290071 |
| 17            | 6             | 0           | 5.330594                | -1.977584 | -0.323714 |
| 18            | 6             | 0           | 5.031760                | -0.651573 | -0.238953 |
| 19            | 6             | 0           | 3.622888                | -0.396949 | -0.153209 |
| 20            | 7             | 0           | 1.433070                | 0.818770  | 0.064941  |
| 21            | 7             | 0           | -1.438219               | 0.818256  | -0.169191 |
| 22            | 6             | 0           | 0.626048                | 2.033003  | 0.257301  |
| 23            | 6             | 0           | -0.619014               | 1.961309  | -0.589975 |
| 24            | 5             | 0           | -2.875007               | 0.941038  | -0.063024 |
| 25            | 5             | 0           | 2.876045                | 0.915022  | 0.012380  |
| 26            | 6             | 0           | 3.625670                | 2.297857  | 0.140483  |
| 27            | 6             | 0           | -3.603533               | 2.336290  | -0.175646 |
| 28            | 6             | 0           | 4.462093                | 2.745810  | -0.900521 |
| 29            | 6             | 0           | 5.177097                | 3.940754  | -0.801171 |
| 30            | 6             | 0           | 5.087932                | 4.714592  | 0.357104  |
| 31            | 6             | 0           | 4.277391                | 4.286773  | 1.410336  |
| 32            | 6             | 0           | 3.555172                | 3.097964  | 1.297471  |
| 33            | 6             | 0           | -3.397872               | 3.368918  | 0.760250  |
| 34            | 6             | 0           | -4.093386               | 4.576411  | 0.682586  |
| 35            | 6             | 0           | -5.015004               | 4.786590  | -0.344988 |

|    |   |   |           |           |           |
|----|---|---|-----------|-----------|-----------|
| 36 | 6 | 0 | -5.240511 | 3.778848  | -1.284061 |
| 37 | 6 | 0 | -4.549081 | 2.569330  | -1.192476 |
| 38 | 1 | 0 | -5.778496 | 0.201901  | 0.282316  |
| 39 | 1 | 0 | -6.333693 | -2.357862 | 0.525994  |
| 40 | 1 | 0 | 6.308364  | -2.437017 | -0.397022 |
| 41 | 1 | 0 | 5.779510  | 0.133669  | -0.230006 |
| 42 | 1 | 0 | 0.347419  | 2.134354  | 1.315085  |
| 43 | 1 | 0 | 1.229756  | 2.897059  | -0.016719 |
| 44 | 1 | 0 | -1.206685 | 2.871885  | -0.493522 |
| 45 | 1 | 0 | -0.342705 | 1.843870  | -1.646770 |
| 46 | 1 | 0 | 4.553077  | 2.149511  | -1.805985 |
| 47 | 1 | 0 | 5.807038  | 4.265115  | -1.625777 |
| 48 | 1 | 0 | 5.648589  | 5.642076  | 0.440213  |
| 49 | 1 | 0 | 4.208448  | 4.878221  | 2.319978  |
| 50 | 1 | 0 | 2.932603  | 2.781079  | 2.132157  |
| 51 | 1 | 0 | -2.689300 | 3.222339  | 1.573991  |
| 52 | 1 | 0 | -3.918296 | 5.351437  | 1.424687  |
| 53 | 1 | 0 | -5.556029 | 5.727023  | -0.410549 |
| 54 | 1 | 0 | -5.958062 | 3.932728  | -2.086219 |
| 55 | 1 | 0 | -4.746189 | 1.790933  | -1.926493 |

### Compound BN-BTBT<sub>h</sub>

**E = -2848.5471862 hartree**

| Center Number | Atomic Number | Atomic Type | Coordinates (Angstroms) |           |           |
|---------------|---------------|-------------|-------------------------|-----------|-----------|
|               |               |             | X                       | Y         | Z         |
| 1             | 6             | 0           | -1.465934               | -1.439400 | 0.056775  |
| 2             | 6             | 0           | 0.736120                | -0.238016 | -0.021083 |
| 3             | 6             | 0           | -0.736133               | -0.238034 | 0.021456  |
| 4             | 6             | 0           | -1.465930               | -1.439422 | -0.056456 |
| 5             | 6             | 0           | -0.718396               | -2.667671 | -0.052431 |
| 6             | 6             | 0           | 0.718412                | -2.667658 | 0.052827  |
| 7             | 6             | 0           | -2.895959               | -1.415353 | -0.099488 |
| 8             | 6             | 0           | 2.895968                | -1.415333 | 0.099583  |
| 9             | 7             | 0           | 1.249959                | -3.885400 | 0.095300  |
| 10            | 7             | 0           | -1.249927               | -3.885420 | -0.094868 |
| 11            | 16            | 0           | 0.000018                | -4.961242 | 0.000305  |
| 12            | 6             | 0           | -3.639133               | -0.234129 | -0.055634 |
| 13            | 6             | 0           | -5.066210               | -0.490488 | -0.146400 |
| 14            | 6             | 0           | -5.355807               | -1.872230 | -0.247819 |
| 15            | 16            | 0           | -3.900753               | -2.860984 | -0.232197 |
| 16            | 16            | 0           | 3.900777                | -2.860965 | 0.232178  |
| 17            | 6             | 0           | 5.355840                | -1.872218 | 0.247463  |
| 18            | 6             | 0           | 5.066234                | -0.490481 | 0.146023  |
| 19            | 6             | 0           | 3.639141                | -0.234116 | 0.055528  |
| 20            | 7             | 0           | 1.431551                | 0.959652  | -0.151767 |

|    |   |   |           |           |           |
|----|---|---|-----------|-----------|-----------|
| 21 | 6 | 0 | 0.612919  | 2.146650  | -0.437959 |
| 22 | 6 | 0 | -0.612964 | 2.146614  | 0.438282  |
| 23 | 7 | 0 | -1.431586 | 0.959633  | 0.152032  |
| 24 | 6 | 0 | 6.664656  | -2.352546 | 0.346878  |
| 25 | 6 | 0 | 7.708718  | -1.433758 | 0.347344  |
| 26 | 6 | 0 | 7.446372  | -0.056919 | 0.250638  |
| 27 | 6 | 0 | 6.144450  | 0.416556  | 0.150797  |
| 28 | 6 | 0 | -6.144418 | 0.416557  | -0.151440 |
| 29 | 6 | 0 | -7.446324 | -0.056914 | -0.251511 |
| 30 | 6 | 0 | -7.708661 | -1.433757 | -0.348192 |
| 31 | 6 | 0 | -6.664606 | -2.352552 | -0.347468 |
| 32 | 5 | 0 | -2.874692 | 1.067378  | 0.116297  |
| 33 | 5 | 0 | 2.874671  | 1.067399  | -0.116196 |
| 34 | 6 | 0 | 3.551818  | 2.488052  | -0.279316 |
| 35 | 6 | 0 | -3.551859 | 2.488020  | 0.279431  |
| 36 | 6 | 0 | 3.998779  | 2.944136  | -1.533573 |
| 37 | 6 | 0 | 4.613939  | 4.189173  | -1.678872 |
| 38 | 6 | 0 | 4.800826  | 5.011933  | -0.566567 |
| 39 | 6 | 0 | 4.369474  | 4.580686  | 0.689163  |
| 40 | 6 | 0 | 3.753645  | 3.334855  | 0.827349  |
| 41 | 6 | 0 | -3.753293 | 3.335039  | -0.827137 |
| 42 | 6 | 0 | -4.369136 | 4.580860  | -0.688914 |
| 43 | 6 | 0 | -4.800892 | 5.011877  | 0.566756  |
| 44 | 6 | 0 | -4.614386 | 4.188906  | 1.678969  |
| 45 | 6 | 0 | -3.999206 | 2.943884  | 1.533634  |
| 46 | 1 | 0 | 1.213403  | 3.036409  | -0.258330 |
| 47 | 1 | 0 | 0.316063  | 2.143549  | -1.495542 |
| 48 | 1 | 0 | -0.316091 | 2.143430  | 1.495860  |
| 49 | 1 | 0 | -1.213460 | 3.036381  | 0.258729  |
| 50 | 1 | 0 | 6.861824  | -3.418165 | 0.423241  |
| 51 | 1 | 0 | 8.733947  | -1.785542 | 0.424277  |
| 52 | 1 | 0 | 8.273318  | 0.647944  | 0.254410  |
| 53 | 1 | 0 | 5.956694  | 1.481347  | 0.078026  |
| 54 | 1 | 0 | -5.956670 | 1.481350  | -0.078688 |
| 55 | 1 | 0 | -8.273265 | 0.647954  | -0.255487 |
| 56 | 1 | 0 | -8.733877 | -1.785538 | -0.425307 |
| 57 | 1 | 0 | -6.861768 | -3.418174 | -0.423807 |
| 58 | 1 | 0 | 3.870970  | 2.313367  | -2.411044 |
| 59 | 1 | 0 | 4.949772  | 4.515412  | -2.660072 |
| 60 | 1 | 0 | 5.281429  | 5.980528  | -0.677012 |
| 61 | 1 | 0 | 4.514822  | 5.212410  | 1.561968  |
| 62 | 1 | 0 | 3.431180  | 3.013464  | 1.816094  |
| 63 | 1 | 0 | -3.430505 | 3.013831  | -1.815835 |
| 64 | 1 | 0 | -4.514177 | 5.212755  | -1.561645 |
| 65 | 1 | 0 | -5.281504 | 5.980465  | 0.677228  |
| 66 | 1 | 0 | -4.950527 | 4.514973  | 2.660120  |
| 67 | 1 | 0 | -3.871691 | 2.312948  | 2.411028  |

---

## References.

- 1 C. Kitamura, S. Tanaka and Y. Yamashita, *Chem. Mater.*, 1996, **8**, 570-578.
- 2 Y. Tsubata, T. Suzuki, Y. Yamashita, T. Mukai and T. Miyashi, *Heterocycles*, 1992, **33**, 337-348.
- 3 C. Istanbuluoglu, S. Goker, G. Hizalan, S. O. Hacıoglu, Y. A. Udum, E. D. Yildiz, A. Cirpan and L. Toppare, *New J. Chem.*, 2015, **39**, 6623-6630.
- 4 L. Torun, B. K. Madras and P. C. Meltzer, *Biorg. Med. Chem.*, 2012, **20**, 2762-2772.
